*Title:*

# **How synaptic strength, short-term plasticity, and input synchrony contribute to neuronal spike output**

*Abbreviated title:*

## **How synaptic properties influence neuronal spiking**

*Authors:*

Alexandra Gastone Guilabert<sup>1\*</sup>  
Moritz O. Buchholz<sup>1\*</sup>  
Benjamin Ehret<sup>1</sup>  
Gregor F.P. Schuhknecht<sup>1,2</sup>

*Author affiliations:*

<sup>1</sup> Institute of Neuroinformatics, University of Zürich and ETH Zürich  
Winterthurerstr. 190  
8057 Zürich  
Switzerland

<sup>2</sup> Department of Molecular and Cellular Biology, Harvard University  
16 Divinity Ave.  
02138 Cambridge, MA  
USA

\* Equal contribution

*Corresponding author:*

Gregor F.P. Schuhknecht ([gregor\\_schuhknecht@fas.harvard.edu](mailto:gregor_schuhknecht@fas.harvard.edu))

*Conflict of Interest:*

The authors declare no competing financial interests.

## 1 **Abstract**

2 Neurons integrate from thousands of synapses whose strengths span an order of magnitude.  
3 Intriguingly, in mouse neocortex, the few 'strong' synapses are formed between similarly tuned cells,  
4 suggesting they determine neuronal spiking output. This raises the question of how other computational  
5 primitives, including 'background' activity from the many 'weak' synapses, short-term plasticity, and  
6 temporal factors contribute to spiking. We combined extracellular stimulation and whole-cell recordings  
7 in mouse barrel cortex to map excitatory postsynaptic potential (EPSP) amplitudes and paired-pulse  
8 ratios of excitatory synaptic connections converging onto individual layer 2/3 (L2/3) neurons. While net  
9 short-term plasticity was weak, connections with EPSPs > 2 mV were exclusively depressing. There  
10 was no evidence for clustering of synaptic properties on individual neurons. Instead, EPSPs and paired-  
11 pulse ratios of connections converging onto the same cells spanned the full range observed across  
12 L2/3, which critically constrains theoretical models of cortical filtering. To investigate how different  
13 computational primitives of synaptic information processing interact to shape spiking, we developed a  
14 computational model of a pyramidal neuron in the rodent L2/3 circuitry, which was constrained by our  
15 own experiments and published *in vivo* data. We found that the ability of strong inputs to evoke spiking  
16 depended on their high temporal synchrony and high firing rates observed *in vivo* and on synaptic  
17 background activity – and not primarily on synaptic strength, which further amplified information  
18 transfer. Our results provide a framework of how cortical neurons exploit complex synergies between  
19 temporal coding, synaptic properties, and noise to transform synaptic inputs into output firing.

## 20 Introduction

21 Pyramidal neurons in neocortex compute spiking responses on the basis of synaptic inputs they receive  
22 from thousands of neurons in the surrounding brain tissue. The strengths of these inputs span one  
23 order of magnitude and typically follow a lognormal distribution: while the majority of synaptic  
24 connections evoke small excitatory postsynaptic potentials (EPSPs), a small minority elicits comparably  
25 large EPSPs (Markram et al., 1997; Tarczy-Hornoch et al., 1999; Song et al., 2005; Feldmeyer et al.,  
26 2006; Buzsáki and Mizuseki, 2014; Cossell et al., 2015). Intriguingly, in mouse primary visual cortex  
27 (V1), such ‘strong’ connections were found to occur predominantly between those neurons that also  
28 exhibit the most similar receptive field properties *in vivo* (Cossell et al., 2015). From these observations,  
29 a simple organizational principle of synaptic strength was proposed, in which the majority of the synaptic  
30 excitation necessary for action potential firing is provided by a small fraction of strong synaptic inputs,  
31 which determine the spike output of the postsynaptic neuron (Cossell et al., 2015). The notion that  
32 synaptic strength is the primary determinant for the functional properties of neocortical circuits is  
33 attractive because it suggests that mapping the strongest connections in functional or structural  
34 analyses reveals the true underlying functional organization of neocortical circuits. However, a more  
35 complex picture recently emerged from ferret V1, where the response selectivity of neurons to visual  
36 stimulation was found to be determined by the cumulative weight of all co-active synapses, and could  
37 not simply be predicted from the tuning of synapses with large EPSPs (Scholl et al., 2020).

38 Several other observations give further weight to the notion that synaptic strength alone is  
39 insufficient to explain neuronal response properties. Synapses are complex biophysical devices, whose  
40 response during ongoing activation is insufficiently captured by only a single weight parameter. It is  
41 intriguing that those cortical synapses that elicit the largest EPSPs also tend to exhibit the most  
42 pronounced short-term depression (Reyes and Sakmann, 1999; Jouhanneau et al., 2015; Lefort and  
43 Petersen, 2017), which can vastly reduce the total charge a synapse can deliver to its postsynaptic  
44 partner during repeated activation (Stratford et al., 1996; Castro-Alamancos and Oldford, 2002; Chung  
45 et al., 2002; Abbott and Regehr, 2004; Boudreau and Ferster, 2005; Bruno and Sakmann, 2006). Thus,  
46 synaptic connections with large EPSPs recorded *in vitro* may operate in a significantly depressed state  
47 *in vivo* due to ongoing spontaneous and stimulus-evoked activation (Boudreau and Ferster, 2005).  
48 Furthermore, even the largest EPSP amplitudes provide only a fraction of the depolarizing charge  
49 necessary to drive the membrane potential of a cortical neuron through the spike threshold. Thus,  
50 temporal coincidence in presynaptic spike trains must necessarily be an important factor for information  
51 coding in neocortex (Bruno and Sakmann, 2006; Banitt et al., 2007; Wang et al., 2010; Schoonover et  
52 al., 2014; Scholl et al., 2020). Finally, neurons *in vivo* operate in the presence of significant synaptic  
53 background activity. Spontaneous firing rates of pyramidal cells in the superficial layers of rodent  
54 sensory areas range between 0.08 to 0.39 Hz *in vivo* (Waters and Helmchen, 2006; de Kock et al.,  
55 2007; Kerr et al., 2007; de Kock and Sakmann, 2009; Niell and Stryker, 2010, 2010; O’Connor et al.,  
56 2010). Because pyramidal neurons in rodent sensory areas are estimated to receive input from up to  
57 ~8000 synapses (Schüz and Palm, 1989), they must experience hundreds to thousands of spontaneous  
58 synaptic events per second. In rodent V1, synaptic connections with small EPSPs occur predominantly  
59 between cells that display different response properties and thus fire with little temporal synchrony

60 during visual stimulation (Cossell et al., 2015). Thus, in rodent sensory areas, the vast majority of  
61 excitatory synapses formed with any given pyramidal neuron provide a constant bombardment of  
62 excitation that seems relatively unrelated to the tuning of that neuron. Therefore, to compute spiking  
63 responses from their synaptic inputs, neocortical neurons operate in a complex parameter space. While  
64 much research has been conducted on the computational role of synaptic strength [e.g. (Lefort et al.,  
65 2009; Cossell et al., 2015; Scholl et al., 2020)], short-term plasticity [e.g. (Abbott et al., 1997; Castro-  
66 Alamancos and Oldford, 2002; Chung et al., 2002; Banitt et al., 2007; Rothman et al., 2009; Díaz-  
67 Quesada et al., 2014)], and the temporal structure within synaptic inputs [e.g. (Bruno and Sakmann,  
68 2006; Banitt et al., 2007; Wang et al., 2010; Schoonover et al., 2014)], it remains much less studied  
69 how these parameters act together to shape information transfer in sensory areas.

70 Here, we combined experimental work and data-driven computational modeling to investigate  
71 systematically how this complex parameter-space could shape the spiking responses of pyramidal  
72 neurons in L2/3 of mouse barrel cortex (S1). The distributions and patterns of action potential firing  
73 rates (de Kock et al., 2007; de Kock and Sakmann, 2009; Sakata and Harris, 2009; O'Connor et al.,  
74 2010), synaptic strength (Lefort et al., 2009; Cossell et al., 2015; Seeman et al., 2018), correlations  
75 within neuronal activity (Kerr et al., 2007; Sato et al., 2007), and temporal correlations within synaptic  
76 inputs converging onto the same neuron (Cossell et al., 2015) have been well-characterized for L2/3 in  
77 rodent sensory areas *in vivo*. However, even though paired-pulse ratios have been measured for  
78 excitatory synapses across all cortical layers and different areas and species, most studies relied on  
79 small datasets that aimed to detect general differences in the mean (Reyes and Sakmann, 1999;  
80 Feldmeyer et al., 2006; Costa et al., 2013; Jouhanneau et al., 2015; Lefort and Petersen, 2017; Seeman  
81 et al., 2018). Thus, a detailed characterization of the exact statistical distribution of short-term plasticity  
82 in mouse sensory L2/3 is missing. Likewise, the relationship between synaptic strength and short-term  
83 plasticity has not been characterized clearly for L2/3. Finally, it remains unknown whether synaptic  
84 connections that converge onto the same neuron exhibit a systematic bias of EPSP amplitudes  
85 (Koulakov et al., 2009) or short-term plasticity, which could endow individual neurons with low-pass  
86 filter or high-pass filter properties, if they were to receive predominantly depressing or facilitating  
87 synapses, respectively (Chance et al., 1998; Fortune and Rose, 2000, 2001; Abbott and Regehr, 2004).  
88 We addressed these questions by combining whole-cell recordings of L2/3 pyramidal neurons in barrel  
89 cortex slices with extracellular stimulation of putatively single axons of passage. Then, we developed a  
90 computational model of a L2/3 pyramidal neuron that received excitatory inputs from 270 other L2/3  
91 neurons (Sarid et al., 2013), whose synaptic strengths and short-term plasticity were modeled after our  
92 experimental data. Presynaptic inputs were set to display temporal firing patterns constrained by *in vivo*  
93 data: the few synaptic connections eliciting large EPSPs fired temporally correlated spikes at high  
94 frequencies and were termed 'strong' inputs, while the more numerous connections triggering small  
95 EPSPs – termed 'weak' inputs – fired uncorrelated spikes at lower frequencies (Cossell et al., 2015).  
96 By selectively manipulating the relationship between synaptic strength, short-term plasticity, and  
97 temporal structure in the synaptic inputs, we characterized the importance of each of these parameters  
98 and their interdependencies in our simulation.

## 99 Results

### 100 Mapping synaptic strength and short-term plasticity in L2/3

101 We characterized the distribution of EPSP amplitudes and corresponding paired-pulse ratios of  
102 excitatory synaptic connections formed with regular-spiking neurons in barrel cortex L2/3 and tested  
103 the theoretical prediction that synaptic connections converging on the same postsynaptic cell may have  
104 systematically biased strengths (Koulakov et al., 2009) or short-term plasticity properties. In order to be  
105 able to characterize multiple, different synaptic connections formed with a given L2/3 neuron, we  
106 measured somatic whole-cell responses to extracellular paired-pulse stimulation of single axons at  
107 multiple locations in the surrounding L2/3 (Fig. 1 A, B).

108 We obtained recordings from 20 regular-spiking neurons for which we identified a total of 74  
109 sites at which minimal extracellular stimulation evoked EPSPs (mean of 3.7 synaptic connections per  
110 neuron). For a subset of these regular-spiking cells, we performed post-hoc biocytin histology to confirm  
111 that they were indeed pyramidal neurons (Fig. 1 A; see *Methods*). Additionally, we recorded from 4 fast-  
112 spiking neurons (i.e., interneurons, as confirmed by post-hoc histology) for which we found a total of 17  
113 extracellular stimulation sites (4.3 synaptic connections per neuron). Thus, our complete dataset  
114 contained 91 evoked EPSPs recorded across 24 L2/3 neurons. We applied stringent quality controls to  
115 ensure that we activated single axons of passage with our minimal stimulation protocol (see *Methods*)  
116 and that we did not stimulate the same axon of passage multiple times. Briefly, we only included  
117 synaptic connections for which the smallest observable EPSP was evoked in an all-or-none manner in  
118 a fraction of trials and if the mean EPSP amplitude and failure rate remained constant throughout the  
119 recording (Larkman et al., 1991; Allen and Stevens, 1994). Moreover, different synaptic connections  
120 converging onto the same postsynaptic cell were only included when their location of stimulation was >  
121 50  $\mu\text{m}$  away from all previous stimulation locations.

122 The distribution of peak amplitudes across the 74 EPSPs recorded in regular-spiking cells  
123 ranged from 0.29 mV to 4.15 mV (mean  $\pm$  s.d.:  $1.23 \pm 0.75$  mV), was markedly right-skewed, and could  
124 be fit well with a lognormal distribution ( $R^2 = 0.97$ ) (Fig. 1 D). The mean coefficient of variation was  $0.19$   
125  $\pm 0.06$ , the mean EPSP onset latency was  $2.14 \pm 1.12$  ms and the mean 10 – 90% rise time was  $2.54$   
126  $\pm 0.86$  ms. For all 74 synaptic connections, we also recorded the paired-pulse ratio at an inter-spike  
127 interval of 20 ms. Interestingly, the distribution of paired-pulse ratios appeared noticeably symmetrical  
128 with a mean  $\pm$  s.d. of  $0.93 \pm 0.20$  and could be fit well with a normal distribution ( $R^2 = 0.93$ ) (Fig. 1 E).

129 A similar picture emerged for the 17 EPSPs recorded in the fast-spiking cells: their amplitudes  
130 ranged from 0.52 mV to 3.03 mV (mean  $\pm$  s.d.:  $1.49 \pm 0.75$  mV) and were best captured by a lognormal  
131 distribution ( $R^2 = 0.65$ ) (Fig. 1 D). The mean coefficient of variation was  $0.18 \pm 0.06$ , the mean onset  
132 latency was  $2.44 \pm 0.99$  ms, and the 10 – 90% rise time was  $0.83 \pm 0.4$  ms. The distribution of  
133 corresponding paired-pulse ratios was also markedly symmetrical with a mean of  $0.87 \pm 0.25$  (Fig. 1 E)  
134 and could be fit well with a normal distribution ( $R^2 = 0.69$ ).

135 Given their different symmetries (lognormal versus normal, respectively), the question arose of how  
136 EPSP amplitudes and their corresponding paired-pulse ratios could be mapped onto one another, i.e.,  
137 whether there was a systematic relationship between synaptic strength and short-term plasticity.

138 Interestingly, a scatter plot of the response amplitudes to the 2<sup>nd</sup> stimulation pulse against the response  
 139 amplitudes to the 1<sup>st</sup> stimulation pulse (corresponding to the EPSP amplitude) showed the tendency  
 140 that synaptic connections with larger EPSPs were depressing, while connections with smaller EPSPs  
 141 exhibited a range of facilitating and depressing paired-pulse ratios (Fig. 1 C, F). However, there was no  
 142 significant correlation in our dataset between EPSP amplitude and short-term plasticity for connections  
 143 formed with either regular-spiking or fast-spiking neurons. A significant negative correlation only  
 144 emerged when we pooled all synaptic connections recorded in the study (Fig 1 F). Thus, EPSP  
 145 amplitude and short-term plasticity appeared to be only weakly correlated across a larger number of  
 146 excitatory synaptic connections in L2/3. Because of the limited number of synaptic connections  
 147 recorded in fast-spiking neurons, however, we excluded these data from further analysis and focused  
 148 the rest of our study on the synaptic connections recorded in regular-spiking neurons.

149

150 To investigate this question further, we binned our dataset of synaptic connections recorded in regular-  
 151 spiking neurons depending on their EPSP amplitude (into 0.5 mV bins, not shown). Critically, we found  
 152 that in all bins with EPSP amplitudes below 2 mV, synaptic connections displayed a range of facilitating  
 153 and depressing paired-pulse ratios (not shown). By contrast, all connections with EPSP amplitudes  
 154 above 2 mV were depressing (n = 10) (Fig. 1 F). When we split the dataset accordingly, we found that  
 155 connections below 2 mV had a mean paired-pulse ratio of  $0.95 \pm 0.20$  (i.e., exhibiting little net short-  
 156 term plasticity), while connections above 2 mV had a significantly lower mean paired-pulse ratio of  $0.83$   
 157  $\pm 0.10$  (Fig. 1 F).

158

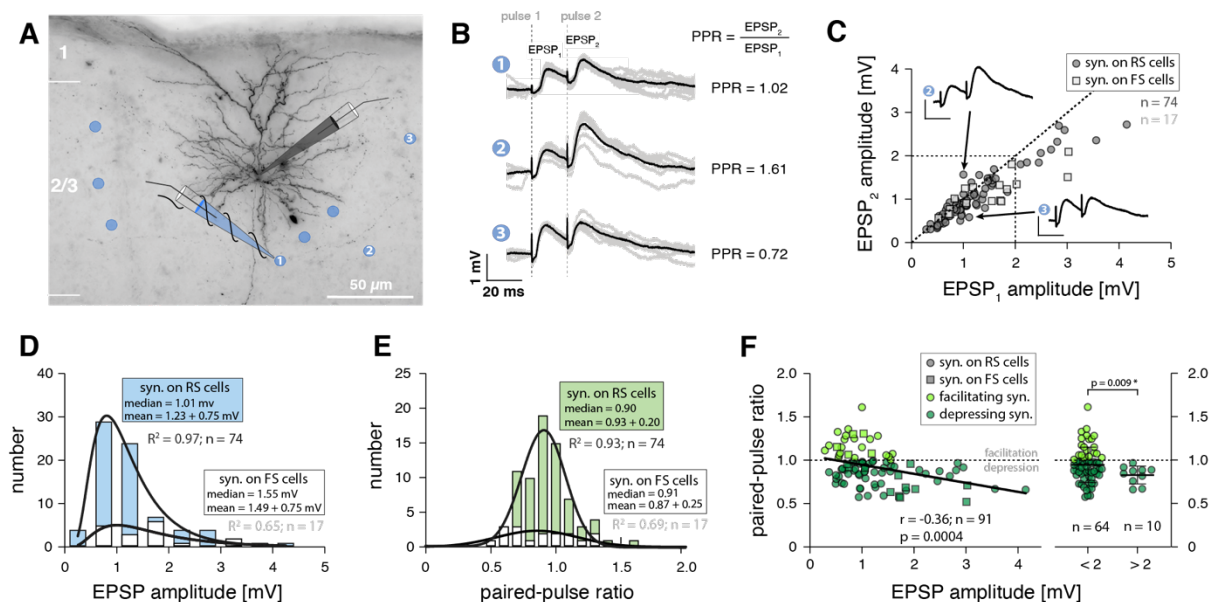

159

160

161 **Figure 1. EPSP amplitudes and paired-pulse ratios of excitatory synaptic connections in barrel cortex L2/3.**

162 **A** Example of recorded regular-spiking L2/3 neuron in mouse barrel cortex visualized through post-hoc biocytin histology. Blue  
 163 dots indicate locations of successful extracellular stimulation, blue pipette signifies extracellular stimulation electrode. The  
 164 neuron's responses to stimulation at three different positions (labeled 1-3) are shown in B.

165 **B** Somatic voltage recordings following 20 ms paired-pulse stimulation in the locations indicated by numbers. Grey traces,  
166 individual trials; black traces, average response; paired-pulse ratios (PPR) indicated. For timing of extracellular stimulation pulses  
167 (dashed lines), note the electrical stimulation artifact in somatic voltage responses.  
168 **C** Scatter plot showing, for all recorded excitatory synaptic connections, the responses to the second pulse versus the response  
169 to the first pulse (corresponding to the EPSP amplitude) of the paired-pulse stimulation paradigm. Circles, synaptic connections  
170 formed with regular-spiking (RS) neurons; squares, connections formed with fast-spiking neurons (FS). Data points below  
171 diagonal indicate depressing synaptic connections, dots above diagonal indicate facilitating connections. Voltage traces, same  
172 as traces 2 and 3 in B with identical same scale bars.  
173 **D** Distribution of EPSP amplitudes recorded in regular-spiking (blue) and fast-spiking L2/3 (white) L2/3 neurons; histograms were  
174 fit with lognormal functions ( $R^2$ , goodness of fit).  
175 **E** Distribution of paired-pulse ratios recorded in regular-spiking (green) and fast-spiking L2/3 (white) L2/3 neurons; histograms  
176 were fit with Gaussian functions ( $R^2$ , goodness of fit).  
177 **F** Left, scatter plot showing relationship of EPSP amplitude and paired-pulse ratio for excitatory synaptic connections formed with  
178 regular-spiking (circles,  $n = 74$ ) and fast-spiking (squares,  $n = 17$ ) cells; light green, facilitating connections; dark green,  
179 depressing connections. Non-parametric Spearman correlation statistics indicated; line was fit to all datapoints with linear  
180 regression. Right, comparison of paired-pulse ratios of synaptic connections formed with regular-spiking neurons that were  
181 binned into 'small' (EPSP < 2 mV) and 'large' (EPSP > 2 mV) synaptic connections (parametric Welch's t test).  
182

### 183 **No clustering of connections with similar paired-pulse ratios on L2/3 neurons**

184 Next, we investigated whether EPSP amplitudes and short-term plasticity across those synaptic  
185 connections formed with the same regular-spiking L2/3 neurons followed the same distributions as  
186 those of all 74 connections across all regular-spiking neurons. Alternatively, the synaptic inputs onto a  
187 given cortical neuron may be statistically correlated, i.e. individual neurons could receive synaptic  
188 connections with systematically biased EPSP amplitudes or paired-pulse ratios that deviate from the  
189 overall distributions found across L2/3, which may constitute a mechanism to endow individual cells  
190 with high-pass or low-pass filtering properties (Fortune and Rose, 2001; Abbott and Regehr, 2004). For  
191 a total of 8 regular-spiking neurons, we were able to characterize at least 5 different afferent synaptic  
192 connections (47 connections in total, mean of 5.9 connections per cell). We will refer to the distribution  
193 of paired-pulse ratios and EPSP amplitudes across all our recorded synapses as the “population  
194 distribution” and to the distributions of paired-pulse ratios and EPSPs of synaptic connections  
195 converging onto a single cell as “cell distributions”. We used the non-parametric Kolmogorov-Smirnov  
196 test to detect if there was a significant difference between the respective cell distributions and the  
197 population distribution. Interestingly, for all 8 cells, the cell distributions were not significantly different  
198 from the population distribution for both EPSP amplitude and paired-pulse ratios (Fig. 2 A, B).

199       Precise quantification of synaptic short-term plasticity requires electrophysiological recordings.  
200 Using whole-cell patch-clamp recordings in combination with minimal stimulation of axons of passage,  
201 however, limits the number of synaptic connections that can be recorded for any given neuron, yielding  
202 low statistical power on the level of individual cells. Therefore, we conducted a power analysis to  
203 estimate the detectable effect sizes in our dataset (see *Methods* for details). For detecting a significant  
204 ( $\alpha = 0.05$ ) difference between each of the 8 paired-pulse ratio cell distributions and the population  
205 distribution, the Kolmogorov-Smirnov test had an average power of 17% for an effect size of 0.1, a  
206 power of 53% for an effect size of 0.2, and a power of 85% for an effect size of 0.3, where effect size  
207 corresponds to a systematic difference in the means of the cell distributions. Thus, the statistical power

208 was low on the level of individual experiments. Because we could repeat the experiment 8 times,  
 209 however, even small systematic differences between cell distributions and population distribution, while  
 210 undetectable in single experiments, should have been revealed in at least one or a few of the 8 neurons  
 211 we recorded from. To investigate this further, we used a binomial model (see *Methods*) to assess the  
 212 power of the entire experimental series by asking: what systematic difference in paired-pulse ratios  
 213 should have been observed in at least one of the 8 experiments at the 95% significance level? We  
 214 found that the probability to detect a significant difference across our entire dataset was 78% for an  
 215 effect size of 0.1 and 99.7 % for an effect size of 0.2, with the 95% significance level at an effect size  
 216 of 0.15. Critically, an effect size of 0.15 is below the paired-pulse ratio difference of 0.16 that we  
 217 detected between the small- and large-EPSP connections formed with pyramidal neurons in L2/3 (Fig.  
 218 2 C). Thus, our experimental series achieved the statistical power necessary to detect differences in  
 219 paired-pulse ratios at physiological magnitudes that we found to exist in L2/3. This suggests that short-  
 220 term plasticity of excitatory synapses formed with individual regular-spiking cortical neurons in L2/3  
 221 spans the full range observed in L2/3 and is not markedly functionally clustered on the level of single  
 222 neurons.

223 Likewise, for detecting a significant difference between each of the 8 EPSP cell distributions  
 224 and the population distribution, the Kolmogorov-Smirnov test had an average power of 4.9% for an  
 225 effect size of 0.2 mV, a power of 15% for an effect size of 0.4 mV, and a power of 46% for an effect size  
 226 of 0.6 mV. Analogous Monte Carlos simulations showed that the probability of detecting a significant  
 227 difference in the mean EPSP amplitudes across our entire dataset was 72% for a systematic effect size  
 228 of 0.4 mV and 99.3 % for a systematic effect size of 0.6 mV, with the 95% significance level at 0.52 mV  
 229 (Fig. 2 C). In summary, these are important experimental results that contradict the theory-inspired  
 230 hypothesis that synaptic inputs onto single cortical neurons may be statistically correlated (Koulakov et  
 231 al., 2009).

232

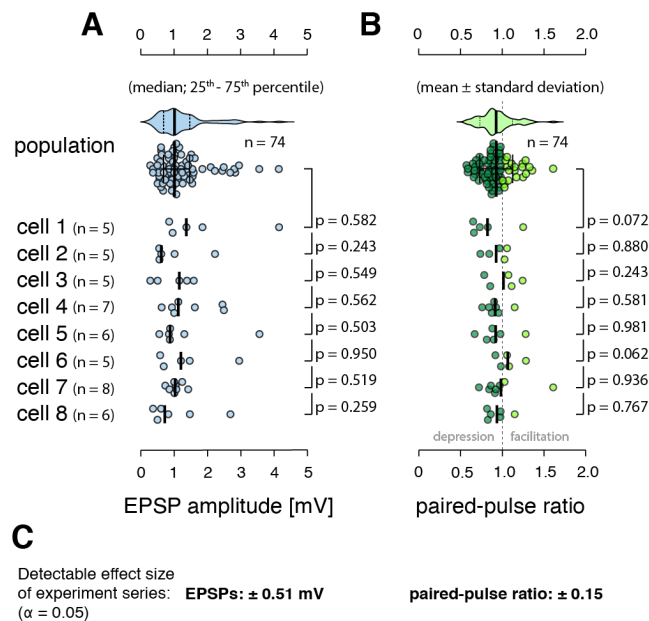

233



234 **Figure 2. Excitatory synaptic connections formed with regular-spiking L2/3 neurons do not exhibit a systematic**  
235 **clustering of EPSP amplitude and short-term plasticity.**

236 **A** Top, distribution of EPSP amplitudes recorded across all regular-spiking neurons (population distribution). Bottom, distributions  
237 of the EPSP amplitudes across the 8 regular spiking neurons, for which at least 5 synapses were found (cell distributions). N,  
238 number of synapses recorded per cell; p, non-parametric Kolmogorov-Smirnov test between each cell distribution and the  
239 population distribution, medians are indicated.

240 **B** Representation of short-term plasticity data, panel layout as in A; light green, facilitating synaptic connections; dark green,  
241 depressing connections, means are indicated.

242 **C** Estimation of the effect sizes that are detectable across the experimental series at a 5% significance level.

243  
244 **Modeling the interplay of synaptic strength, short-term plasticity, and temporal**  
245 **input structure**

246 We generated a two-compartment, conductance-based model of a L2/3 pyramidal neuron to investigate  
247 how synaptic strength, short-term plasticity, and temporal structure in synaptic inputs interact within the  
248 L2/3 circuitry to shape the response properties of cortical neurons (Fig. 3 A – C; see *Methods for*  
249 *details*). For this purpose, we developed a data-driven modeling approach: we constrained firing rates  
250 and pairwise correlations of presynaptic inputs by *in vivo* observations and synaptic strength and short-  
251 term plasticity by our experimental data recorded in regular-spiking neurons.

252 Briefly, the model neuron received excitatory inputs from 270 presynaptic neurons (Feldmeyer  
253 et al., 2006; Sarid et al., 2013), whose synaptic weights (Fig. 3 D) and short-term plasticity properties  
254 (Fig. 3 E) were constrained following our extracellular stimulation experiments (see *Methods*). Note that  
255 this number of presynaptic L2/3 cells is based on the assumption that L2/3 neurons form on average 3  
256 anatomical synapses with their postsynaptic partners in L2/3 (Feldmeyer et al., 2006; Sarid et al., 2013).  
257 In our model, this is captured by the fact that the axons of passage we activated with minimal stimulation  
258 must have also formed multiple synapses with the recorded neurons on average. This is evident when  
259 comparing the range of EPSP amplitudes we recorded with minimal stimulation (0.29 – 4.15 mV) with  
260 EPSP amplitudes obtained from paired recordings (0.15 – 2.25 mV), for which the number of anatomical  
261 synapses per connection (mean of 1.6) was additionally established from EM (Holler et al., 2021). The  
262 temporal input correlations (Cossell et al., 2015) (Fig. 3 F) and the firing rates (O'Connor et al., 2010)  
263 (Fig. 3 G) across the 270 synaptic inputs were constrained by published *in vivo* data for rodent cortex  
264 (see *Methods*), such that a small number of strong synaptic inputs fired temporally correlated spikes at  
265 high frequencies and exhibited large EPSP amplitudes and corresponding short-term depression. The  
266 remaining majority of weak synapses, providing ‘background’ activity, were set to fire at low frequencies  
267 and in a temporally uncorrelated pattern, resembling a random Poisson process, and exhibited low  
268 EPSP amplitudes without pronounced net short-term plasticity (Fig. 3 A, B).

269  
270 After the model was set up in this manner, we verified that all parameters were distributed following  
271 experimental data and that the interdependencies between EPSP amplitude and short-term plasticity  
272 and EPSP amplitude and temporal correlation structure (Cossell et al., 2015) were preserved (Fig. 4).  
273 The model EPSP amplitude distribution (Fig. 3 D, Fig. 4 A; mean  $\pm$  s.d.:  $1.23 \pm 0.69$  mV,  $n = 270$ ) and  
274 paired-pulse ratio distribution for a 20 ms paired-pulse interval (Fig. 3 E, Fig. 4 B; mean  $\pm$  s.d.:  $0.91 \pm$

275 0.19,  $n = 270$ ) did not differ from the distributions we had measured in regular-spiking neurons *in vitro*  
276 ( $p = 0.90$  and  $p = 0.67$ , respectively; non-parametric Kolmogorov-Smirnov tests). The mapping between  
277 EPSP amplitude and short-term plasticity across the model inputs (Fig. 4 A, B) followed the same  
278 relationship as observed *in vitro*: EPSP amplitudes  $> 2$  mV had significantly lower paired-pulse ratios  
279 (mean  $\pm$  s.d.:  $0.82 \pm 0.08$ ) compared with EPSP amplitudes  $< 2$  mV (Fig 3 E; mean  $\pm$  s.d.:  $0.92 \pm 0.20$ ;  
280  $p < 0.0001$ , parametric Welch's t test), and due to the larger sample size compared to our *in vitro* data,  
281 there was a negative correlation between EPSP amplitude and paired-pulse ratio ( $r = -0.26$ ,  $p < 0.0001$ ,  
282  $n = 270$ , non-parametric Spearman correlation coefficient). In accordance with electrophysiological  
283 recordings obtained from rodent sensory L2/3 *in vivo* (O'Connor et al., 2010), the firing rates of the  
284 inputs followed a lognormal distribution ( $R^2 = 0.88$ ) with a mean of  $1.9 \pm 2.4$  Hz (Fig. 4 C), the strong  
285 synaptic inputs had a mean firing rate of  $6.4 \pm 4.1$  Hz (maximum: 17.7 Hz), and the weak synaptic inputs  
286 had a mean firing rate of  $1.2 \pm 0.9$  Hz (Fig. 3 G). The strong inputs exhibited the highest pairwise  
287 correlation coefficients (mean  $\pm$  s.d.:  $0.24 \pm 0.09$ ; range: 0.11 to 0.45), while the weak inputs exhibited  
288 little correlation (mean  $\pm$  s.d.:  $0.02 \pm 0.04$ ; range: -0.05 to 0.15)(Fig. 3 F)(Cossell et al., 2015).

289

290 To examine information transfer between the synaptic inputs and the output firing pattern of the model  
291 neuron, we measured the Pearson correlation coefficient between each input spike train and the model  
292 neuron's output spike train. We further characterized the neuronal gain of the model cell by mapping its  
293 input-output relationship (i.e., the probability of spiking as a function of the number of coincident synaptic  
294 inputs). By selectively manipulating the relationship between synaptic strength, short-term plasticity,  
295 and temporal structure in the synaptic inputs, we then systematically characterized the contribution of  
296 each of these parameters on information transfer and neuronal gain. Each experiment was repeated  
297 for a total of 100 simulation runs; whereby for each iteration, we randomly re-generated a new set of  
298 270 input spike trains.

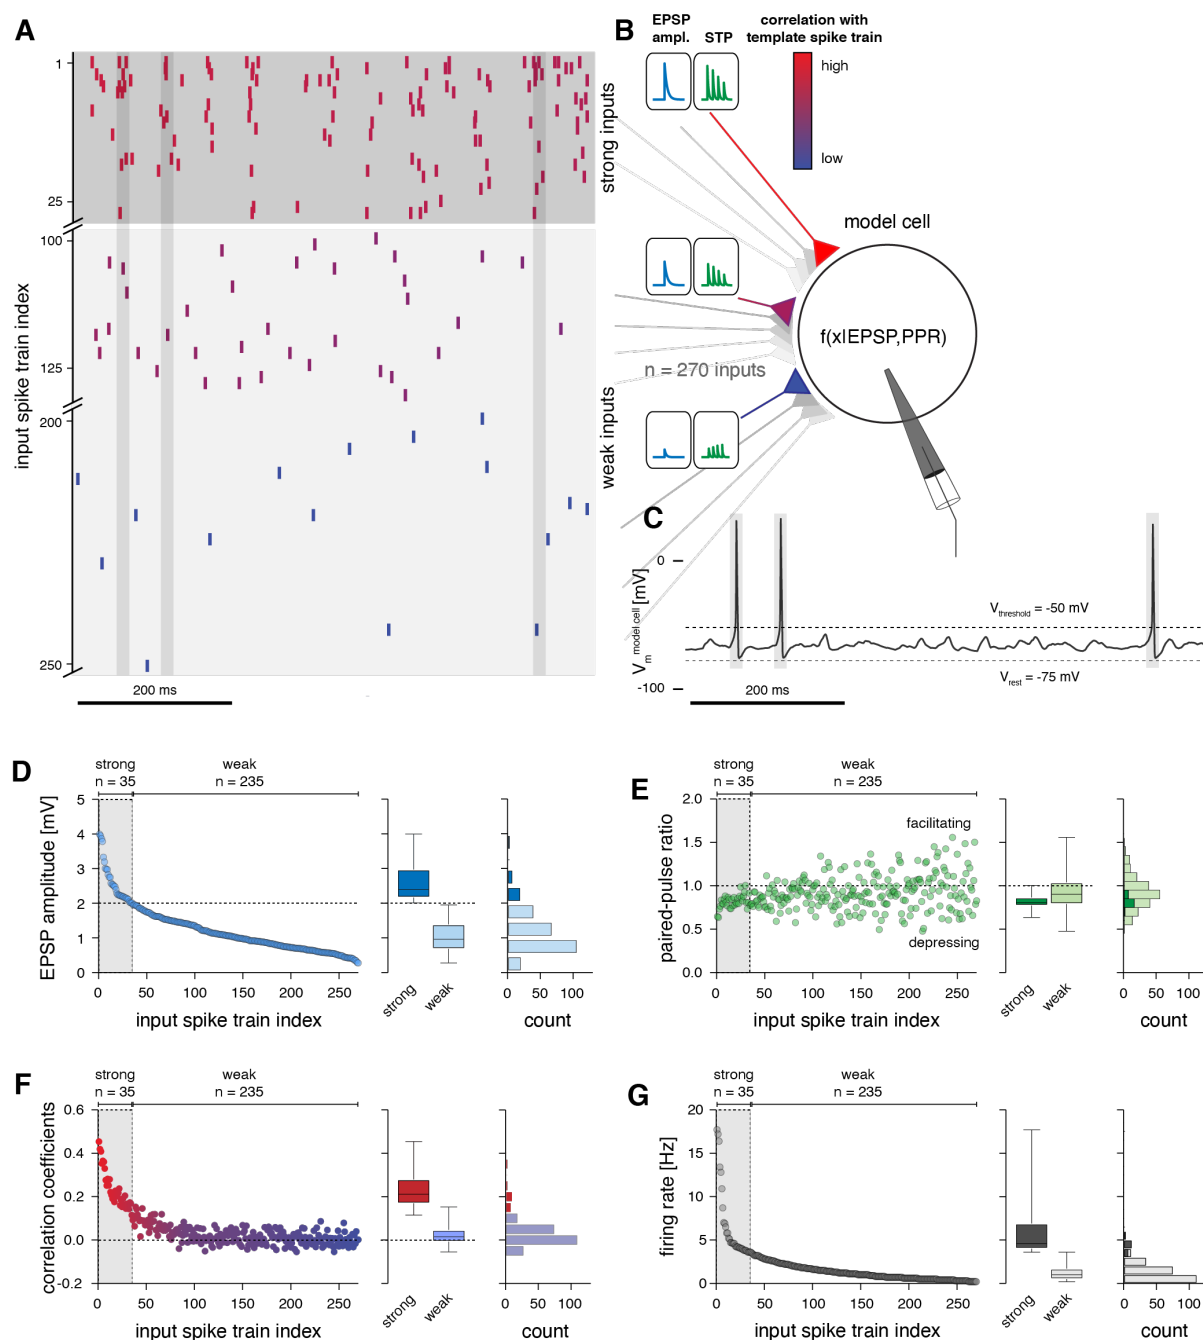

299

300

301 **Figure 3. Default setup of the L2/3 neuron model.**

302 **A** Example of input spike trains fed to the model cell. Strong inputs (top) fired with higher frequencies and temporal correlation  
 303 (color coded), compared to weak inputs (bottom). Vertical grey bands indicate the resulting spike timing in the model cell (same  
 304 as in C). Note that some weak inputs did not spike in the depicted 200 ms time window because of their low firing rates.

305 **B** Strong inputs were set to have larger EPSP amplitudes and corresponding short-term depression, while weak inputs were set  
 306 to evoke smaller EPSPs and correspondingly weak net short-term plasticity, in accordance with our *in vitro* recordings.

307 **C** Simulated membrane potential of model neuron following activation with the input spike trains shown in A.

308 **D** Left, EPSP amplitudes across the 270 input spike trains. Center, comparison of EPSP amplitudes between strong and weak  
 309 inputs (median, 25 – 75 % percentile, and ranges are indicated). Right, same data plotted as histogram.

310 **E** Left, 20 ms paired-pulse ratios across the 270 input spike trains. Center, comparison of paired-pulse ratios between strong and  
 311 weak inputs (median, 25 – 75 % percentile, and ranges are indicated). Right, same data plotted as histogram.

312 F Left, Pearson correlation coefficients of the 270 input spike trains with the template spike train that was used to generate the  
 313 pairwise correlation structure (see *Methods*); color code as in A, B. Center, comparison of correlation with template spike train  
 314 between strong and weak inputs (median, 25 – 75 % percentile, and ranges are indicated). Right, same data plotted as histogram.  
 315 G Left, firing rates of the 270 input spike trains. Center, comparison of firing rates between strong and weak inputs (median, 25  
 316 – 75 % percentile, and ranges are indicated). Right, same data plotted as histogram.  
 317  
 318

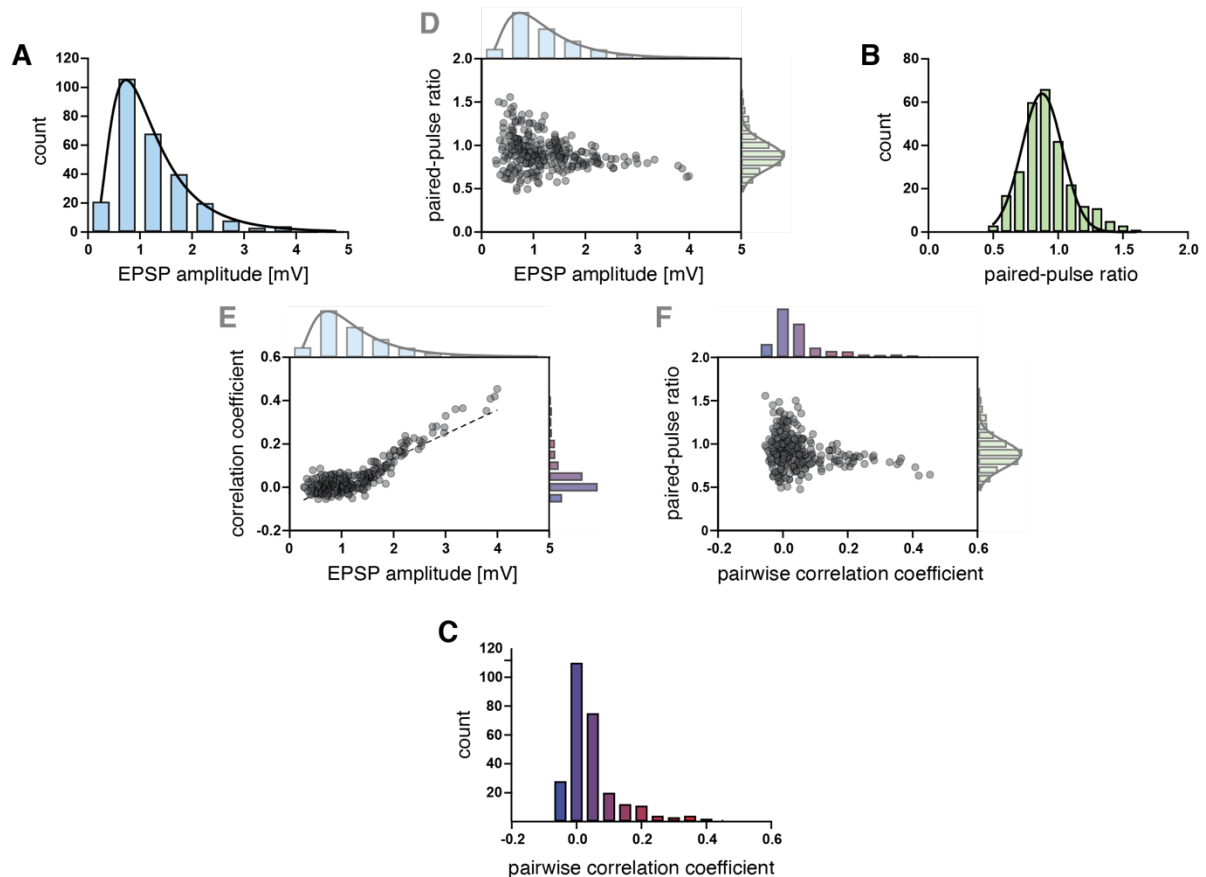

319  
 320

321 **Figure 4. Mapping between synaptic strength, short-term plasticity, and correlation in input spike trains.**

322 The relationships between parameter distributions reflects our *in vitro* data and *in vivo* data adopted from Cossell et al. (2015).

323 **A** EPSP distribution for 270 inputs generated from our *in vitro* recordings.

324 **B** 20 ms paired-pulse ratio distribution for 270 inputs generated from our *in vitro* recordings.

325 **C** Pairwise-correlation coefficients for 270 inputs generated from *in vivo* data adopted from Cossell et al. (2015).

326 **D** Scatter plot of relationship between EPSP amplitudes and 20 ms paired-pulse ratios for the 270 inputs.

327 **E** Scatter plot of relationship between EPSP amplitudes and pairwise-correlation coefficients for the 270 inputs.

328 **F** Scatter plot of relationship between 20 ms paired-pulse ratios and pairwise-correlation coefficients for the 270 inputs.

329

330 First, we ran the simulation in its default ‘physiological’ setup, i.e., with parameters and parameter-  
 331 mappings as found in our *in vitro* recordings and published *in vivo* data (Fig. 3, 5). Critically, without  
 332 further tuning, the model neuron reproduced key properties of rodent L2/3 pyramidal neurons *in vivo*. It  
 333 generated output spike trains with an average firing rate of  $4.81 \pm 0.71$  Hz (Fig. 3 C, 5 F), which is in  
 334 excellent agreement with experimental measurements of *in vivo* spike rates in mouse barrel cortex L2/3  
 335 (O’Connor et al., 2010). The average membrane voltage ( $V_m$ ) of the model neuron was  $-65.93$  mV  $\pm$

336 7.82 mV (Fig. 5 B, D), comparable to *in vivo* whole-cell recordings in mouse L2 (Jouhanneau et al.,  
337 2015). As expected, the strong synaptic inputs shared the highest Pearson correlation coefficients  
338 (mean  $\pm$  s.d.:  $0.11 \pm 0.038$ ; range: 0.064 to 0.20) with the resulting output spike train of the model  
339 neuron (Cossell et al., 2015), while the weak inputs displayed correlation coefficients one order of  
340 magnitude smaller (mean  $\pm$  s.d.:  $0.012 \pm 0.013$ ; range: -0.0041 to 0.065) (Fig. 5 E). Across all inputs,  
341 spike trains with decreasing intrinsic correlation, smaller EPSP amplitudes, and lower spike rates  
342 displayed increasingly lower correlation coefficients with the output spike train (Fig. 5 E). We confirmed  
343 that the Pearson correlation coefficients indeed detected correlations in spike timing rather than in firing  
344 rates by randomizing the output spike times following a random Poisson process while keeping the  
345 output firing rate identical. Reassuringly, the correlations between all inputs and the output spike train  
346 then dropped to  $-0.0005 \pm 0.0032$  (not shown).

347

### 348 **Synaptic background activity enhances information transfer of strong inputs**

349 We probed the relative influence of the strong versus weak synaptic inputs on the output spiking of our  
350 model cell. Critically, when we removed the weak inputs (Fig. 5 A, B), the mean correlation between  
351 the strong inputs and the output spike train was reduced to  $0.068 \pm 0.019$  (range: 0.034 to 0.10) (Fig. 5  
352 E, F). The output firing rate of the model neuron dropped to  $1.26 \pm 0.34$  Hz (Fig. 5 F) and its average  
353  $V_m$  was hyperpolarized to  $-68.39\text{mV} \pm 4.57\text{mV}$ . Despite the sharp drop in information transfer of the  
354 strong synaptic inputs, those inputs with the highest intrinsic correlation and synaptic strength still  
355 maintained the highest correlation with output spiking (Fig. 5 E). Removal of weak inputs also resulted  
356 in a steeper slope of the input-output curve (Fig. 5 G), confirming that synaptic ‘background noise’ has  
357 a divisive effect on neuronal gain. This noise broadens a neuron’s sensitivity to the range of temporal  
358 correlations in input spike trains by increasing the time window over which coincident inputs can be  
359 integrated to evoke spiking, a finding in agreement with previous studies (Silver, 2010).

360 Conversely, when we removed the strong synaptic inputs from the simulation (Fig. 5 C),  
361 uncorrelated activity provided by the weak inputs was by itself unable to drive the postsynaptic neuron  
362 above spiking threshold and the output firing rate dropped to  $0.045 \pm 0.068$  Hz (Fig. 5 F). This is because  
363 the 235 weak inputs fired at an average frequency of  $1.2 \pm 0.9$  Hz with mean EPSP amplitudes of  $1.03$   
364  $\pm 0.42$  mV, which resulted in a mean membrane potential of  $67.68 \pm 1.67$  mV that rarely crossed the  
365 spike threshold (Fig. 5 D). Thus, uncorrelated activity of weak synapses alone was incapable of evoking  
366 spikes and did not transfer information encoded in its own spike trains (Fig. 5 E). Importantly, however,  
367 it had a powerful computational effect on neuronal activity because it enhanced information transfer of  
368 the strong, correlated inputs by a factor of 2.

369

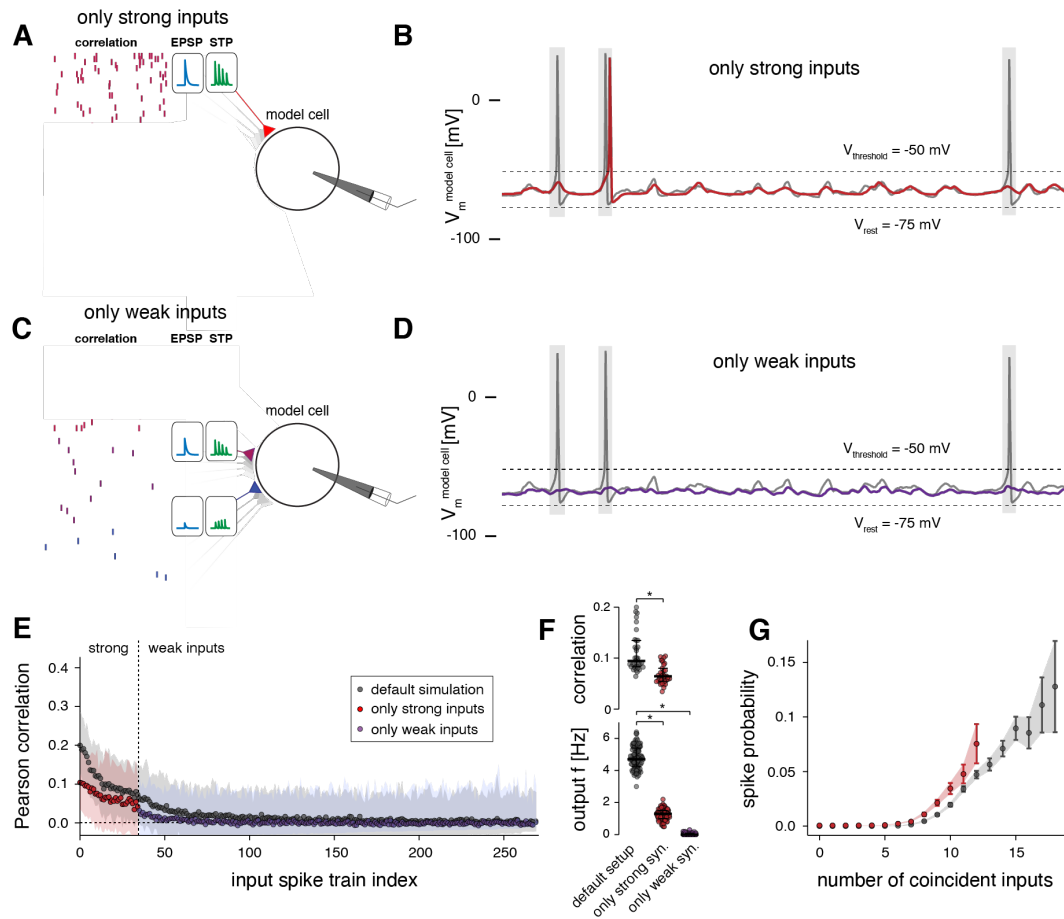

370

371

**Figure 5. Uncorrelated activity from weak inputs enhances information transfer of strong synaptic inputs**

372 **A** Schematic of model setup with weak inputs removed.

373 **B** Example spike train of the model cell in its default setup (grey) and when weak inputs are removed (red).

374 **C** Schematic of model setup with strong inputs removed.

375 **D** Example spike train of the model cell in its default setup (grey) and when strong inputs are removed (purple).

376 **E** Pearson correlation coefficients of the 270 input spike trains with the output spike train of the model cell. Results of three model  
377 setups are shown: default simulation (all inputs, as in Fig. 3) and setups introduced in A, C. Shaded regions, 95 % confidence  
378 bounds for correlation coefficients obtained from 100 runs of the simulation.

379 **F** Top, Pearson correlation coefficients between the strong synaptic inputs and the output spike train of the model neuron for the  
380 default simulation and setup introduced in A. Bottom, output firing rate of model cell for the default simulation and the setups  
381 introduced in A-C. (Data are averages across 100 simulation runs; median and 25 – 75 % percentile indicated; non-parametric  
382 Kolmogorov-Smirnov test, \*  $p < 0.0001$ .)

383 **G** Probability of output spiking as a function of coincident spikes across all input spike trains. (Note that the maximum number of  
384 coincident inputs within the 20 ms measurement window was 12 when only strong inputs were included, thus determining the  
385 maximum x-value for the red curve.)

386

387

### 388 **Output spiking requires correlation and high firing rates of strong inputs**

389 Next, we decoupled the high temporal correlation and high firing rates of strong inputs from their larger  
390 synaptic strengths by randomly assigning the EPSP amplitudes and their corresponding short-term  
391 plasticity properties across the input spike trains (Fig. 6 A). Note that the original coupling between  
392 EPSP amplitude and short-term plasticity was maintained in this experiment, i.e., synapses with larger  
393 EPSPs still exhibited depression and synapses with smaller EPSPs exhibited facilitation.

394 When the model was set up in this manner, the firing rate of the output neuron decreased to  
 395  $1.11 \pm 0.68$  Hz (Fig. 6 B, D). Critically, inputs with higher temporal correlation and higher firing rates still  
 396 contributed more strongly to the firing of the model neuron (Pearson correlation mean  $\pm$  s.d.:  $0.056 \pm$   
 397  $0.016$ ; range: 0.035 to 0.095) compared to inputs with lower temporal correlations and lower firing rates  
 398 (mean  $\pm$  s.d.:  $0.009 \pm 0.008$ ; range: -0.004 to 0.042) (Fig. 6 C). This means that synaptic strength by  
 399 itself did not determine which inputs transmitted the most information to the spike train of the output  
 400 neuron. Instead, in our simulation, the combination of high temporal correlation and elevated firing rates  
 401 of strong synaptic inputs was the primary determinant for evoking correlated spiking in the output  
 402 neuron. However, matching larger EPSP amplitudes to inputs that fired with high temporal correlation  
 403 and high firing rates (i.e., our default setup), as observed for the strong synaptic inputs *in vivo* (Cossell  
 404 et al., 2015), increased their correlation with the spike train of the model neuron by a factor of 2 and  
 405 enhanced their information transfer (Fig. 6 C, D). Decoupling the large EPSP amplitudes from the  
 406 correlated inputs (by shuffling EPSP amplitudes amongst all input spike trains) furthermore resulted in  
 407 a flatter slope of the model's input-output curve and a reduced responsiveness to coincident inputs  
 408 (maximum spike probability ( $P_{\max}$ ) of 0.15; Fig 6 E). This suggests that assigning the largest EPSP  
 409 amplitudes to those inputs that fired at high temporal correlation has a multiplicative effect on neuronal  
 410 gain, leading to signal amplification as a mechanism to increase efficient information transmission of  
 411 strong inputs (Silver, 2010).  
 412

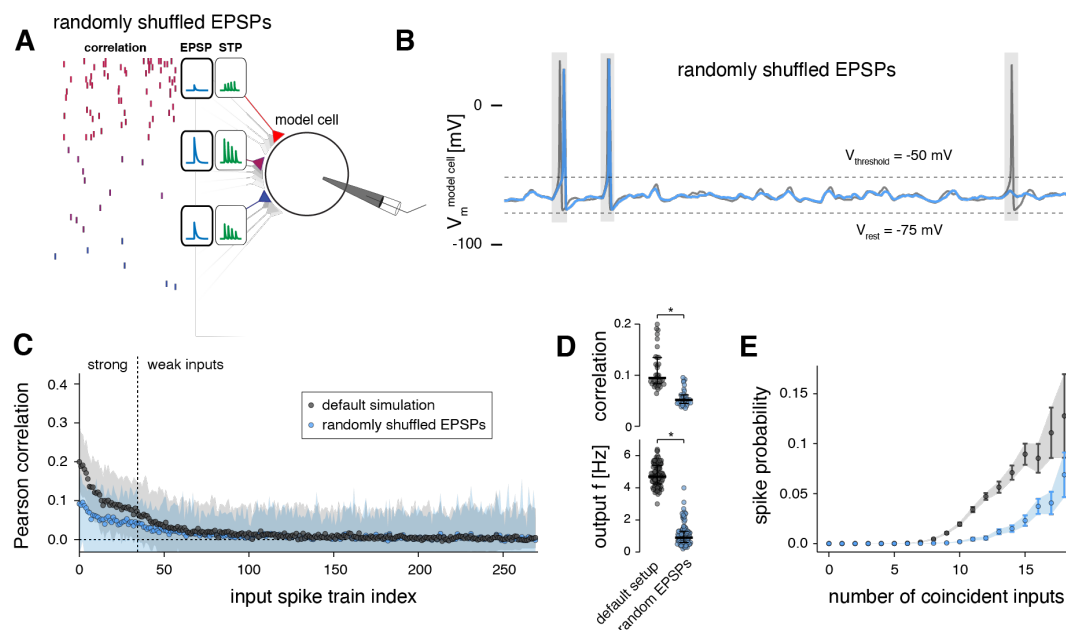

413  
 414 **Figure 6. Temporal correlation and firing rates primarily determine output spiking, synapse strength enhances response.**  
 415 **A** Schematic of model setup with shuffled EPSP amplitudes; note that the relationship of EPSP amplitude and short-term plasticity  
 416 was maintained.  
 417 **B** Example spike train of the model cell in its default setup (grey) and with shuffled EPSP amplitudes (blue).  
 418 **C** Pearson correlation coefficients of the 270 input spike trains with the output spike train of the model cell. Results of two model  
 419 setups are shown: default simulation (as in Fig. 3) and setup introduced in A. Shaded regions, 95 % confidence bounds for  
 420 correlation coefficients obtained from 100 runs of the simulation.  
 421 **D** Top, Pearson correlation coefficients between the strong synaptic inputs and the output spike train of the model neuron for the  
 422 default simulation and setup introduced in A. Bottom, output firing rate of model cell for the default simulation and the setup

423 introduced in A. (Data are averages across 100 simulation runs; median and 25 – 75 % percentile indicated; non-parametric  
424 Kolmogorov-Smirnov test, \*  $p < 0.0001$ .)  
425 **E** Probability of output spiking as a function of coincident spikes across all input spike trains.  
426

## 427 **Short-term plasticity balances the computational effects of strong and weak** 428 **inputs**

429 Next, we removed the short-term plasticity mechanism from all synapses, such that they exhibited  
430 paired-pulse ratios of 1 for all inter-spike-interval durations, i.e., synaptic strength remained static during  
431 repeated stimulation (Fig. 7 A, B).

432 When running the simulation in this setup, the model neuron fired at  $17.4 \pm 0.63$  Hz, which was  
433 an even higher frequency than exhibited by those input spike trains with the highest firing rates (Fig. 7  
434 F). At the same time, the mean correlation coefficient of the strong inputs with the output spike train of  
435 the model neuron had doubled to  $0.20 \pm 0.082$ , with the largest values exceeding 0.4 (Fig. 7 E, F). Also  
436 the correlation coefficients of the weak inputs with the output spike train had increased to  $0.018 \pm 0.023$   
437 (Fig. 7 E). Notably, because the weak synaptic inputs had been only mildly depressing on average in  
438 our default setup (Fig. 3 E), removing their short-term plasticity mechanism should only have a small  
439 net boosting effect on their total excitatory drive. To confirm this, we additionally removed the weak  
440 inputs from the model entirely (Fig. 7 C, D) and found that this indeed had no significant effect on the  
441 correlation coefficients between the strong inputs and the resulting spike train of the model neuron (Fig.  
442 7 E, F) nor on the output firing rate of the model cell (Fig. 7 F). Thus, after removing short-term plasticity,  
443 the computational effect of the weak inputs in maximizing information transfer of strong inputs had  
444 become entirely redundant. In this regime, the strong synapses alone could determine the spiking  
445 properties of the model neuron.

446 Furthermore, the slopes of the input-output curves were markedly steeper when the short-term  
447 plasticity mechanism was removed and when the weak inputs were removed in addition (Fig. 7 G),  
448 which confirms that short-term depression of strong inputs has a divisive impact on neuronal gain  
449 (Abbott et al., 1997; Rothman et al., 2009), therefore broadening the neuron's responsiveness to  
450 temporal correlations in input spike trains (Silver, 2010).



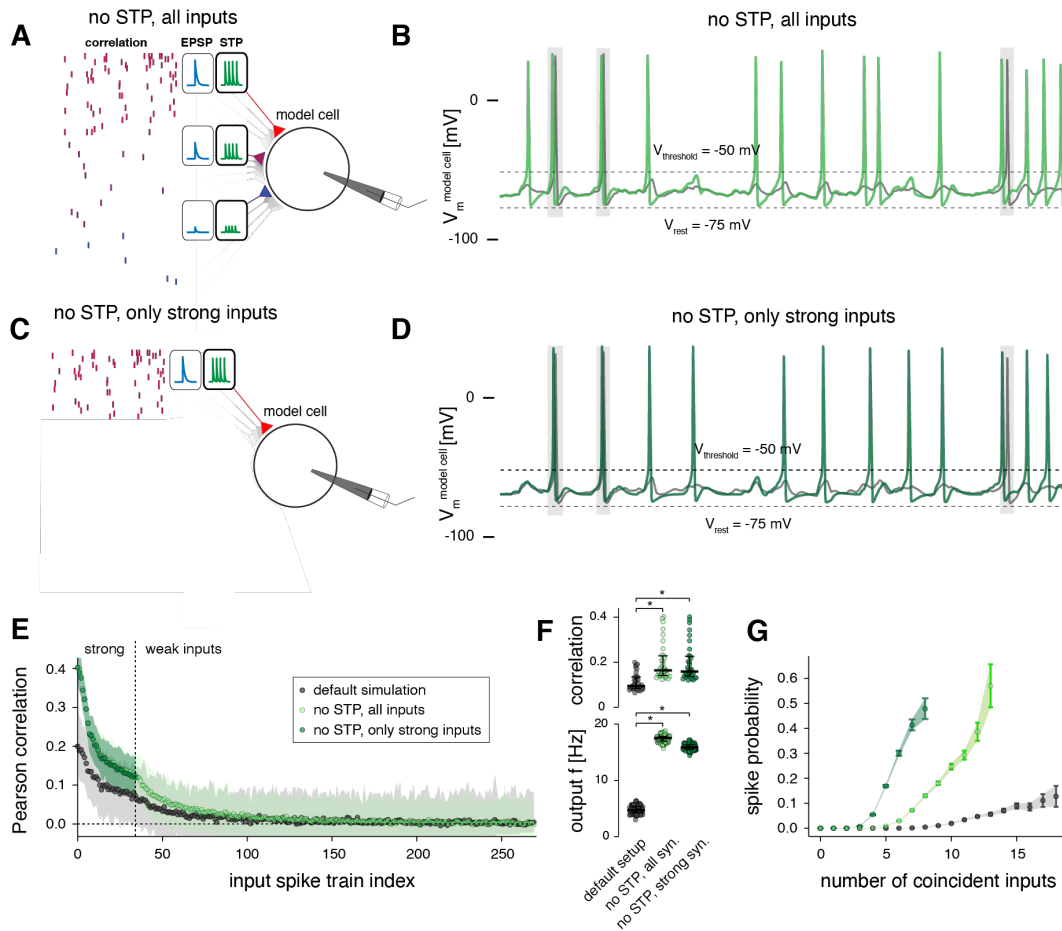

451  
452  
453  
454  
455  
456  
457  
458  
459  
460  
461  
462  
463  
464  
465  
466  
467  
468  
469

**Figure 7. Short-term plasticity balances the computational effects of strong and weak inputs**

**A** Schematic of model setup with short-term plasticity mechanisms removed; note that all spike trains exhibit a paired-pulse ratio of 1.

**B** Example spike train of the model cell in its default setup (grey) and when short-term plasticity mechanisms are removed (light green).

**C** Schematic of model setup with short-term plasticity mechanisms removed and the weak inputs removed in addition.

**D** Example spike train of the model cell in its default setup (grey) and when short-term plasticity mechanisms and weak inputs are removed (dark green).

**E** Pearson correlation coefficients of the 270 input spike trains with the output spike train of the model cell. Results of three model setups are shown: default simulation (as in Fig. 3) and setups introduced in A, C. Shaded regions, 95 % confidence bounds for correlation coefficients obtained from 100 runs of the simulation.

**F** Top, Pearson correlation coefficients between the strong synaptic inputs and the output spike train of the model neuron for the default simulation and setups introduced in A-C. Bottom, output firing rate of model cell for the default simulation and the setups introduced in A-C. (Data are averages across 100 simulation runs; median and 25 – 75 % percentile indicated; non-parametric Kolmogorov-Smirnov test, \*  $p < 0.0001$ .)

**G** Probability of output spiking as a function of coincident spikes across all input spike trains.

## 470 **Discussion**

471 We combined experimental work and computational modeling to investigate how the spiking responses  
472 of L2/3 pyramidal neurons are shaped by the complex parameter-space of temporal structure within  
473 synaptic inputs, synaptic strength, and short-term plasticity.

474 As a first step, we mapped experimentally the distribution of synaptic strength and short-term  
475 plasticity in barrel cortex L2/3. We found that short-term plasticity follows a symmetrical distribution with  
476 large variance and is mildly depressing on average. Interestingly, synaptic strength and short-term  
477 plasticity were only weakly negatively correlated across our dataset. Instead, their relationship was well-  
478 captured by the simple rule that synaptic connections with EPSP amplitudes below 2 mV span the full  
479 range of depression and facilitation and exhibit no pronounced average short-term plasticity. By  
480 contrast, connections with EPSP amplitudes above 2 mV are exclusively depressing, which raises the  
481 intriguing question of what the computational role is for depression of strong synapses.

482 Our computational model of a L2/3 neuron suggested that the ability of the strong synaptic  
483 inputs to evoke spiking in postsynaptic cells relies predominantly on their high temporal correlation and  
484 high firing rates, as well as on synaptic background activity from the numerous weak synapses, and not  
485 primarily on their synaptic strength. Pairing those ‘driving’, co-tuned synaptic connections with strong  
486 synaptic weights, however, as has been reported for rodent V1 (Cossell et al., 2015), does amplify their  
487 ability to transmit information to the output spike train.

488

## 489 **Technical considerations of minimal stimulation**

490 We used minimal stimulation of axons of passage to map EPSP amplitudes and paired-pulse ratios of  
491 multiple, different synaptic connections formed with the same postsynaptic neurons. This study design  
492 rendered paired whole-cell recordings unfeasible, as the number of synaptic connections that can be  
493 identified with paired recordings is usually low. To ensure that EPSPs originated from single axons, we  
494 carefully followed established protocols (Larkman et al., 1991; Allen and Stevens, 1994) and imposed  
495 strict data inclusion criteria (see *Methods*). Minimal extracellular stimulation of axons of passage is a  
496 classical technique in neuroscience [e.g. (Larkman et al., 1991, 1992; Allen and Stevens, 1994;  
497 Volgushev et al., 1995; Stratford et al., 1996)] and although it cannot be ruled out that several afferent  
498 axons may be activated in principle, previous work suggests that this is unlikely to occur in practice. For  
499 example, studies that mapped synaptic connections with minimal stimulation have reported similar  
500 EPSP amplitudes [(Stratford et al., 1996; Hardingham and Fox, 2006); our data] and numbers of release  
501 sites (Hardingham and Fox, 2006) when compared with paired recordings of the same connections  
502 (Stratford et al., 1996; Silver et al., 2003; Hardingham et al., 2010; Holler et al., 2021). Thus, the  
503 possibility of synaptic connections arising from several afferent axons was assumed to be negligible in  
504 our dataset.

505

## 506 **Short-term plasticity in barrel cortex L2/3**

507 While mild average depression in rodent barrel cortex L2/3 is in agreement with previous reports (Reyes  
508 and Sakmann, 1999; Feldmeyer et al., 2006), other studies have found excitatory L2/3 synapses in

509 sensory areas to be moderately facilitating on average (Jouhanneau et al., 2015; Lefort and Petersen,  
510 2017; Seeman et al., 2018). Intriguingly, Jouhanneau et al. (2015) and Lefort and Petersen (2017) used  
511 paired recordings in layer 2 (L2). While Seeman et al. (2018) conducted paired recordings across the  
512 entire thickness of L2/3, they reported only mild average facilitation with large overall heterogeneity.

513 We recorded from neuronal somata in superficial L2/3, likely corresponding to the layer  
514 investigated by Jouhanneau et al. (2015) and Lefort and Petersen (2017), but stimulated axons of  
515 passage across the entire depth of L2/3. Thus, differences between these datasets may indicate  
516 differences in synaptic properties between L2 recurrent connections (Jouhanneau et al., 2015; Lefort  
517 and Petersen, 2017) and the L3 -> L2 pathway. This is in line with a growing body of literature describing  
518 structural (Karimi et al., 2020) and functional (Crochet et al., 2011; Petersen and Crochet, 2013)  
519 differences between the neuronal circuits in L2 and L3 and further supports the notion that L2 and L3,  
520 which are routinely considered to constitute a single computational entity, may in fact possess different  
521 computational properties (Petersen and Crochet, 2013; Karimi et al., 2020).

522

### 523 **No evidence for a statistical bias of synaptic innervation on L2/3 neurons**

524 Interestingly, we found no statistical bias of synaptic strength or short-term plasticity of synaptic  
525 connections formed with the same pyramidal neurons in L2/3. Instead, our data suggest that synaptic  
526 inputs formed with a given L2/3 neuron are not markedly correlated, but that their strengths and short-  
527 term plasticity instead follow the same distribution as that of all synaptic connections across the  
528 neuropil. Such statistical biases have been hypothesized to explain lognormal firing rate distributions in  
529 cortex (Koulakov et al., 2009) and have been proposed as a potential mechanism for endowing neurons  
530 with high-pass or low-pass filter properties that may underlie integration and differential activation  
531 (Lisman, 1997; Fortune and Rose, 2001; Abbott and Regehr, 2004). Importantly, by demonstrating the  
532 absence of such systematic biases on the single-cell level, our experimental results provide a critical  
533 biological constraint for theoretical models of how these particular computations may arise in L2/3.

534 Because we have characterized synaptic strength and short-term plasticity through somatic  
535 whole-cell recordings, we cannot exclude the intriguing possibility that statistical biases of synaptic  
536 innervation may exist on the level of dendritic branches, in which case such computations may be  
537 implemented on a sub-cellular level (Kastellakis et al., 2015; Bloss et al., 2018). Further experiments  
538 will be necessary to investigate this possibility.

539

### 540 **L2/3 neuron model reproduces key computation properties of cortical circuits**

541 To address the computational role of depression of strong connections and to investigate how synaptic  
542 strength, short-term plasticity, and temporal properties in presynaptic spike trains within the L2/3  
543 circuitry shape the firing properties of neurons, we generated a simplified model of a L2/3 pyramidal  
544 neuron and systematically manipulated these parameters in our simulation. The synaptic inputs to the  
545 model neuron were constrained by physiological data obtained from our own *in vitro* recordings and  
546 with *in vivo* data adopted from the literature (O'Connor et al., 2010; Cossell et al., 2015). To focus our  
547 study on the L2/3 circuitry, we constrained the model neuron to receive synaptic connections only from  
548 other L2/3 neurons, i.e., connections from layer 4 and the deep layers were not modeled, such that it

549 was not necessary to include inhibitory synapses in the simulation to balance excitation. Reassuringly,  
550 without further parameter tuning, the model exhibited key computational properties of cortical neurons  
551 that have been characterized in experiments and simulations before: the model cell produced sparse  
552 firing at around 5 Hz, which is in excellent agreement with the average spike rate reported for mouse  
553 barrel cortex L2/3 (O'Connor et al., 2010), and its output spike train exhibited the highest temporal  
554 correlation with the strong synaptic inputs (Cossell et al., 2015). In addition, our simulations could  
555 reproduce the effects of multiplicative gain modulation through synaptic background activity (Salinas  
556 and Sejnowski, 2001; Chance et al., 2002) and through short-term depression of strong synapses  
557 (Abbott et al., 1997; Rothman et al., 2009).

558 We found that synaptic background activity carried through the weak synapses contributed  
559 critically to information transfer of strong inputs through a stochastic resonance-type effect (Faisal et  
560 al., 2008): while being incapable of evoking spiking by itself, the weak inputs enabled the model neuron  
561 to operate in a regime in which the cell became sensitive and responsive to coincident strong inputs  
562 (Bulsara et al., 1991; Hô and Destexhe, 2000; Chapeau-Blondeau and Rousseau, 2002; London et al.,  
563 2002; McDonnell and Abbott, 2009; Durand et al., 2013). Even then, the high firing rates and the  
564 synchronous activity of multiple strong synapses were needed to evoke spiking in the model neuron  
565 (Bruno and Sakmann, 2006; Banitt et al., 2007; Wang et al., 2010; Schoonover et al., 2014; Martin and  
566 Schröder, 2016). Notably, synaptic strength alone did not determine which presynaptic cells could  
567 evoke spikes (Scholl et al., 2020).

568

### 569 **Short-term depression balances the synaptic drive of strong inputs**

570 The computational role of the relationship between short-term plasticity and synaptic strength has not  
571 been addressed in detail in studies of cortical processing. Interestingly, the pronounced short-term  
572 depression we observed for synaptic connections eliciting large EPSPs *in vitro* proved necessary to  
573 counterbalance the high firing rates, high temporal correlations, and large EPSP amplitudes of strong  
574 inputs during ongoing stimulation and was critical for maintaining the responsiveness of the  
575 postsynaptic neuron towards input spike trains with the highest temporal correlation. This suggests that  
576 short-term depression could act as one of the mechanisms that prevent runaway excitation in the  
577 recurrent L2/3 circuitry.

578

### 579 **A framework for orientation tuning in columnar and ‘salt-and-pepper’ cortices**

580 The notion that the minority of strong synaptic inputs determines the response properties of cortical  
581 neurons (Cossell et al., 2015; Znamenskiy et al., 2018; Goetz et al., 2021) has recently been challenged  
582 by apparently conflicting findings made in V1 of the ferret (Scholl et al., 2020). In mouse V1, neurons  
583 with the most similar receptive field properties *in vivo* also formed the strongest synaptic connections  
584 with each other, as assessed *in vitro* (Cossell et al., 2015). By contrast, the response selectivity of  
585 neurons in ferret V1 *in vivo* was shown to be determined by the cumulative weight of all driving synapses  
586 – weak and strong. Intriguingly, the response selectivity could not be predicted from the tuning of strong  
587 synapses alone (Scholl et al., 2020).

588           Our result that spiking in the model neuron was driven predominantly by high temporal input  
589 correlation and high firing rates, while synaptic strength further enhanced information transfer of these  
590 driving inputs may provide a framework to reconcile these apparently contradictory findings. In the  
591 columnar V1 of carnivores (Hubel and Wiesel, 1962), presentation of simple visual stimuli activates  
592 populations of neighboring neurons within the same orientation column (Ohki et al., 2005). The axons  
593 of pyramidal cells in the superficial layers of V1 form a primary cluster of synaptic boutons around their  
594 own somata (Martin et al., 2014). Thus, unlike in rodents, these neurons are excited by many  
595 neighboring neurons with the same orientation tuning and ocular dominance. Therefore, ‘columnar’  
596 orientation maps, which are found in visual areas of higher mammals (Gilbert and Wiesel, 1989; Malach  
597 et al., 1994; Bosking et al., 1997; Sincich and Blasdel, 2001) may provide the basis for the “strength by  
598 numbers” necessary to generate tuned responses (Scholl et al., 2020), without the additional  
599 requirement of stronger synapses between co-tuned neurons. Our finding that the high temporal  
600 correlation and firing rates of strong inputs, and *not* their larger synaptic strength primarily drive spiking  
601 supports this idea and is consistent with the observation that spikes in cat V1 are phase-locked with the  
602 local field potential, which reflects synchrony within local neuronal populations (Martin and Schröder,  
603 2016).

604           By contrast, the ‘salt-and-pepper’ organization of rodent V1 (Girman et al., 1999), means that  
605 oriented stimuli activate a spatially diffuse network (Ohki et al., 2005). Therefore, neurons may receive  
606 fewer synaptic connections overall from similarly tuned cells and temporal correlation and firing rates  
607 alone may be insufficient to achieve orientation tuning. Our observation that pairing large EPSP  
608 amplitudes with correlated input spike trains further enhances the capacity of driving inputs to transmit  
609 information suggests that this predicted ‘lack of strength by numbers’ in rodent V1 may be compensated  
610 for by stronger synapses between similarly tuned neurons (Cossell et al., 2015). This, however, leads  
611 to the prediction that in mouse V1, the temporal structure in input spike trains from similarly tuned  
612 neurons also plays a key role in generating orientation tuning *in vivo*, a prediction that could be tested  
613 experimentally.

614           In summary, our results provide a framework for how cortical neurons could utilize interactions  
615 between the biophysical properties of chemical synapses, the temporal structure of input spike trains,  
616 and ‘noise’ in neuronal networks for efficient computation.

## 617 **Methods**

### 618 **Animals**

619 Cortical slices were obtained from 13 male B6/C57 mice between 22 and 29 postnatal days of age  
620 under the license of Kevan A.C. Martin (Institute of Neuroinformatics, University of Zurich & ETH Zurich,  
621 Zurich, Switzerland). Animal handling and experimental protocols were approved by the Cantonal  
622 Veterinary Office, Zurich, Switzerland.

623

### 624 **Slice preparation**

625 Animals were anesthetized with isoflurane, decapitated, and their brains were removed quickly and  
626 immersed in ice-cold slicing artificial cerebrospinal fluid (ACSF, containing, in mM: 87 NaCl, 75 sucrose,  
627 26 NaHCO<sub>3</sub>, 10 glucose, 7 MgSO<sub>4</sub>, 2.5 KCl, 1 NaH<sub>2</sub>PO<sub>4</sub>, and 0.5 CaCl<sub>2</sub>, continuously oxygenated with  
628 95% O<sub>2</sub>, 5% CO<sub>2</sub>). Coronal slices containing the barrel cortex were cut at a thickness of 300 μm on a  
629 vibratome and transferred to a chamber containing recoding ACSF (containing, in mM: 119 NaCl, 26  
630 NaHCO<sub>3</sub>, 10 glucose, 1.3 MgSO<sub>4</sub>, 2.5 KCl, 1.25 NaH<sub>2</sub>PO<sub>4</sub>, and 2.5 CaCl<sub>2</sub>, continuously oxygenated  
631 with 95% O<sub>2</sub>, 5% CO<sub>2</sub>). The slices were kept in recording ACSF at room temperature until the recordings.

632

### 633 **Electrophysiology**

634 Patch pipettes (pipette resistance: 5-7 MΩ, pipette tip diameter: 2 μm) were pulled from borosilicate  
635 glass using a P-97 puller (Sutter Instruments) and filled with intracellular solution (containing in mM:  
636 105 K-gluconate, 20 KCl, 10 Na-phosphocreatine, 2 Mg-ATP, 2 Na-ATP, 0.3 GTP, and 10 HEPES, pH  
637 was set to 7.2 with KOH). Biocytin (0.5%) was added to the intracellular solution to stain the recorded  
638 neurons. Whole-cell patch-clamp recordings were obtained at 34-36 °C from visually identified L2/3  
639 neurons in barrel cortex under an Olympus BX61W1 microscope equipped with infrared differential-  
640 interference contrast optics and a 10x and a 60x water-immersion objective. Data were acquired with a  
641 Multiclamp 700A amplifier (Axon Instruments), sampled at 10 kHz, filtered at 3 kHz (Digidata 1322A,  
642 Axon Instruments) and monitored with the software pClamp (Molecular Devices). We did not add  
643 GABA<sup>A</sup> (Allen and Stevens, 1994; Volgushev et al., 1995; Hardingham and Fox, 2006) or NMDA  
644 antagonists to the bath (Allen and Stevens, 1994; Volgushev et al., 1995), as previous studies have not  
645 reported any discernible effects on the EPSP waveform from including these blockers in minimal  
646 extracellular stimulation experiments (Larkman et al., 1991, 1992, 1997).

647 Following break-in, the access resistance was typically in the range of 15-30 MΩ and recordings  
648 with an access resistance > 30 MΩ were discarded. The bridge potential was compensated and liquid-  
649 junction potential was not corrected. V<sub>m</sub> after break-in ranged from -85 to -70 mV. If V<sub>m</sub> drifted during  
650 recordings, a holding current was injected to keep the membrane at its initial resting potential, which  
651 was rarely necessary. Because V<sub>m</sub> was close to the reversal potential of GABA<sup>A</sup> in all experiments, we  
652 expect there was no contamination of our recorded EPSPs by inhibitory connections.

653 We then performed minimal stimulation of single axons of passage according to established  
654 protocols (Larkman et al., 1991; Allen and Stevens, 1994), as follows. After establishing whole-cell  
655 recordings, we identified presynaptic axons forming synapses with the recorded cells by carefully

656 moving a monopolar extracellular stimulation electrode (filled with ACSF) through L2/3 at an oblique  
657 angle and delivering repeated 0.1 ms current pulses of 10-12  $\mu$ A amplitude using an A360 stimulator  
658 (World Precision Instruments) until an EPSP was detected in the patched neuron. Synaptic connections  
659 were typically detected when the stimulation electrode was located 20-400  $\mu$ m distant from the soma  
660 of the recorded cell. To achieve stimulation of single axon fibers synapsing onto the patched neuron,  
661 we then decreased the stimulation amplitude until the EPSP was not elicited anymore and subsequently  
662 increased the stimulation amplitude until the smallest observable EPSP was evoked reliably in an all-  
663 or-none manner in a fraction of trials (Larkman et al., 1991; Allen and Stevens, 1994). The final  
664 stimulation amplitude was set to this level (typically 5-16  $\mu$ A). We only recorded synaptic connections  
665 that showed little or no variability in the latency of evoked EPSPs from trial to trial. We then performed  
666 20 ms paired-pulse stimulation at a low frequency (0.2 Hz) for at least 30 sweeps. After recordings, we  
667 carefully assessed each sweep by eye in pClamp 9 (Molecular Devices) and included only those  
668 sweeps in the final dataset for which an EPSP was evoked following both extracellular stimulation  
669 pulses and whose evoked EPSPs were not contaminated by spontaneously occurring EPSPs. As an  
670 additional control to ensure that we were stimulating single axons of passage (Allen and Stevens, 1994)  
671 and that the synaptic connection remained stable throughout the recording period, we only included  
672 synaptic connections when the EPSPs at the end the recording had the identical average amplitude,  
673 latency, and shape compared to the first evoked minimal stimulation EPSPs. Our final dataset contained  
674 on average  $11.2 \pm 5$  sweeps per synaptic connection (range of 6 to 35 sweeps).

675 Following the minimal stimulation protocol, we carefully moved the extracellular stimulation  
676 electrode to other locations in the L2/3 neuropil to identify different axon fibers forming synapses with  
677 the same recorded neuron. Great care was taken not to record from the same stimulation location  
678 multiple times, and synaptic connections were only included when their location of stimulation was  $> 50$   
679  $\mu$ m away from all previous stimulation locations, as assessed in 10x overview images during recordings.  
680 At the end of each experiment, we injected current steps into each neuron to characterize its firing  
681 pattern as regular-spiking (i.e., putatively excitatory/ pyramidal neuron) or fast-spiking (putatively  
682 inhibitory/ interneuron).

683

## 684 **Histology**

685 After recordings, slices were immediately fixed in 15% picric acid, 4% paraformaldehyde, and 0.5%  
686 glutaraldehyde in 0.1 M phosphate buffer (PB) overnight. Fixed slices were then washed in PB,  
687 incubated in an ascending sucrose ladder for cryoprotection, quickly frozen in liquid nitrogen, and  
688 treated in 3% hydrogen peroxide and 10% methanol in phosphate-buffered saline (PBS) to quench  
689 endogenous peroxidases. After washing in PBS and tris-buffered saline (TBS), the slices were treated  
690 with the Vectastain ABC Kit (Vector Laboratories, catalog # PK-6100, RRID: AB\_2336819) in TBS at 4  
691  $^{\circ}$ C overnight. Following washing in TBS, biocytin was visualized using nickel-diaminobenzidine (Ni-  
692 DAB) tetrahydrochloride and hydrogen peroxide treatment, followed by a series of washes in PB to  
693 terminate the reaction. Sections were then embedded in Mowiol (Sigma Aldrich) and cover-slipped. Z-  
694 stacks of the recovered neurons were imaged under an Olympus BX61 microscope to cross-check the  
695 previously determined electrophysiological cell type with anatomy. Pyramidal cells and interneurons

696 were identified on the basis of their dendrite morphology (e.g., spiny dendrites versus smooth dendrites,  
697 respectively) and corresponded with the previously recorded regular-spiking firing pattern and fast-  
698 spiking firing patterns, respectively.

699

## 700 **Analysis of electrophysiological data**

701 We analyzed each postsynaptic potential evoked with paired-pulse stimulation with Stimfit individually  
702 (Guzman et al., 2014) and measured its peak amplitude, coefficient of variation, onset latency (i.e., the  
703 time from the onset of the extracellular stimulation artifact to the onset of the evoked postsynaptic  
704 potential) and 10% - 90% rise time. The EPSP was defined as the postsynaptic potential evoked by the  
705 first pulse of the paired-pulse paradigm, i.e., before STP took place. The paired-pulse ratio was defined  
706 as the peak amplitude of the second evoked postsynaptic potential divided by the peak amplitude of  
707 the first evoked postsynaptic potential (i.e., the EPSP). Further statistical analyses were done in Matlab  
708 (MathWorks) and Prism (GraphPad).

709 To obtain an unbiased population distribution for a given experiment, we excluded all afferent  
710 synaptic connections formed with the postsynaptic neuron in that experiment, but otherwise included  
711 all other connections recorded in regular spiking neurons. The cell distribution for a given experiment  
712 included all afferent synaptic connections formed with the postsynaptic neuron in that experiment.

713

714 We conducted a post-hoc Monte-Carlo power analysis to estimate which effect sizes (i.e., systematic  
715 differences between mean EPSP amplitudes or mean paired-pulse ratios between the cell distribution  
716 and the population distribution) were detectable given the sample sizes in our dataset. We did this for  
717 each experiment individually by bootstrapping new cell distributions with systematically different means  
718 and then performing Kolmogorov-Smirnov tests against the population distribution.

719 Specifically, for the power analysis for paired-pulse ratios, we first formalized the paired-pulse  
720 ratio population distribution for each experiment as a normal distribution with the same mean and  
721 standard deviation as the experimentally observed paired-pulse ratio population distribution for that  
722 experiment. To test which effect sizes were detectable, we then formalized a range of possible  
723 underlying generator distributions for the paired-pulse ratio cell distribution for that experiment by  
724 varying the mean of the population distribution in steps of  $\pm 0.1$  units. By doing so, we designed a range  
725 of generator distribution for the paired-pulse ratio cell distribution with systematically different means.  
726 For each one of these cell generator distributions, we then drew the same number of random samples  
727 that were present in the experimentally observed cell distribution (i.e., between 5 and 8) and ran a  
728 Kolmogorov-Smirnov tests against a random sample drawn from the formalized population distribution  
729 (containing the same number of entries as the population distribution for that experiment). This analysis  
730 was repeated 10,000 times for each cell generator distribution and the statistical power for detecting an  
731 effect of a certain size (i.e., the systematic difference in the means between the underlying cell  
732 generator distribution and the population distribution) was defined as the fraction of trials that yielded a  
733 significant p-value ( $\alpha = 0.05$ ), see *Results*. The power analysis for EPSP amplitudes was done in an  
734 analogous fashion with the only exception that lognormal distributions were used instead of normal  
735 distributions, in accordance with our results.



736           Because our dataset contained 8 experiments for which at least 5 afferent connections were  
737 mapped, there were 8 chances for detecting a significant difference between a cell and the population  
738 distribution across our experimental series. Thus, a simple binomial model can be used to ask: which  
739 systematic difference in paired-pulse ratios should have been observed in at least one of these 8  
740 experiments at the 95% significance level? To answer this, we computed the probability density  
741 functions for obtaining zero as a realization (i.e., the likelihood of observing no significant difference  
742 across any of the 8 experiments) of simple binomial functions with  $N = 8$  (i.e., the number of our  
743 independent experiments) and  $P =$  the average probability of observing a given effect size in a single  
744 experiment (as derived above, see *Results*). We then repeated these analyses in an analogous fashion  
745 for the EPSP amplitude distributions.

746

### 747 **Conductance-based model of L2/3 neuron**

748 We generated a simplified two-compartment, conductance-based model (Pinsky and Rinsky, 1994;  
749 Mainen and Sejnowski, 1996; Larkum, 2004; Yi et al., 2017) of a L2/3 pyramidal neuron in the NEURON  
750 software (Hines and Carnevale, 1997). The model neuron consisted of an active soma (diameter of 20  
751  $\mu\text{m}$ ) with a Hodgkin-Huxley spiking mechanism and a passive dendrite receiving all synaptic inputs  
752 (diameter of 2  $\mu\text{m}$ ; length of 100  $\mu\text{m}$ ). We set up the model in accordance with experimentally measured  
753 passive electrical properties of barrel cortex pyramidal cells, previous models of L2/3 neurons, and our  
754 own experimental data.

755           Because the exact ion-channel compositions for L2/3 neurons are not well established, passive  
756 biophysical parameters are routinely modelled as being homogeneously distributed in models of L2/3  
757 neurons (Branco et al., 2010; Smith et al., 2013; Ferrarese et al., 2018). It has been determined  
758 experimentally that the specific axial resistance ( $R_i$ ) of pyramidal neurons ranges between 70 Ohm cm  
759 to 100 Ohm cm (Stuart and Spruston, 1998), we set  $R_i$  of the dendrite to 100  $\Omega$  cm (Wang et al., 2010)  
760 to account for the shorter dendrite length and  $R_i$  of the soma to 1  $\Omega$  cm (Wang et al., 2010). In  
761 accordance with previous models, we set the specific membrane capacitance ( $C_m$ ) of the dendrite to  
762 1.3  $\mu\text{F cm}^{-2}$  to account for dendritic spines, which were not modeled explicitly, and to 1.7  $\mu\text{F cm}^{-2}$  for  
763 the soma (Wang et al., 2010). The passive membrane resistivity ( $R_m$ ) was set to 8000 Ohm  $\text{cm}^2$  (Branco  
764 et al., 2010; Branco and Häusser, 2011; Smith et al., 2013; Ujfalussy et al., 2018), corresponding to a  
765 dendritic leak conductance ( $g_{\text{leak}}$ ) of 0.126  $\text{mS/cm}^2$ ;  $g_{\text{leak}}$  of the soma was set to 0.0379  $\text{mS/cm}^2$   
766 (Lajeunesse et al., 2013), and  $V_m$  was set to -70 mV in accordance with our electrophysiological  
767 recordings. To generate action potentials at the soma, we inserted NEURON's custom Hodgkin-and-  
768 Huxley-spiking mechanism at the somatic compartment and used its default values for the active  
769 voltage-gated potassium ( $g^k$  of 0.036 S /  $\text{cm}^2$ ) and sodium conductance ( $g^{\text{Na}}$  of 0.12 S /  $\text{cm}^2$ ).

770           We inserted 270 synaptic conductances on the dendritic compartment (equidistant to the soma)  
771 whose spike times, synaptic weights and short-term plasticity parameters were set as described in the  
772 following sections. Briefly, we first constructed 270 spike trains whose pairwise correlation coefficients  
773 and firing rates reproduced *in vivo* observations from rodent L2/3 (see *Results*). We then assigned  
774 these spike trains with EPSP amplitudes and corresponding paired-pulse ratios that reproduced our *in*  
775 *vitro* data. Synaptic strength was then tuned such that the EPSP amplitudes at the soma of the model

776 neuron matched exactly the somatic EPSP amplitudes we had measured *in vitro* (see below).  
777 Importantly, because of this, EPSP amplitudes were independent of the choice of passive biophysical  
778 model parameters and there was no need to test the robustness of our simulations towards different  
779 sets of passive biophysical model parameters.

780

### 781 **Generating input spike trains with temporal correlations following *in vivo* data**

782 We generated 270 input spike trains whose pairwise correlation coefficients matched the *in vivo* data  
783 reported by Cossell et al. (2014), i.e., the minority of (strong) input spike trains exhibited high pairwise  
784 correlation coefficients, while the remaining majority of (weak) input spike trains were subsequently less  
785 correlated. We first generated a template spike train of 10 s duration that exhibited a sparse and  
786 irregular temporal structure by using an inhomogeneous Poisson renewal process and sampling inter-  
787 spike interval durations from a gamma distribution (shape  $k = 1.1$ , inter-spike interval mean of 40 ms)  
788 at 1 ms time steps, which resulted in an average firing rate of 25 Hz. We convolved the template spike  
789 train with Gaussian envelopes of different standard deviations ( $\sigma_{\text{Gaussian}}$ ) to generate a set of 270 new  
790 spike trains with precisely defined correlation statistics (Azouz, 2005). We divided the 270 inputs into  
791 strong ( $n = 35$ , i.e., 13 % of inputs) and weak inputs ( $n = 235$ , i.e., 87 % of inputs) based on the  
792 relationship between EPSP amplitude and short-term plasticity we had found *in vitro* (i.e., synapses  
793 with EPSP amplitudes  $> 2$  mV (10 / 74 synaptic connections, i.e., 13.5 %) were exclusively depressing,  
794 while synapses with EPSP amplitudes  $< 2$  mV displayed the full range of short-term plasticity). In order  
795 to set up these two populations of input spike trains with corresponding temporal correlation statistics,  
796 we sampled  $\sigma_{\text{Gaussian}}$  from two uniform distributions for strong ( $\sigma_{\text{Gaussian}}$  between 5 and 10 ms,  $n = 35$ )  
797 and weak synaptic inputs ( $\sigma_{\text{Gaussian}}$  between 10 and 100 ms,  $n = 235$ ) (Azouz, 2005). The resulting 270  
798  $\sigma_{\text{Gaussian}}$  values were ranked and assigned to the 270 input spike trains. For each one of the 270 input  
799 spike trains, we convolved the spike times of the template spike train with a Gaussian envelope whose  
800 standard deviation was set by each spike train's respective  $\sigma_{\text{Gaussian}}$ . By doing so, for each spike train,  
801 we obtained a 10 s time course consisting of a sum of Gaussian distributions representing the  
802 respective spike probability over time. Because of the iteratively increasing  $\sigma_{\text{Gaussian}}$ , this spike  
803 probability distribution for spike trains with increasing indices continuously broadens and flattens with  
804 respect to the template spike train. We then generated the discrete spike times for each input spike  
805 train by drawing spike times from these time-dependent spike probability distributions using an  
806 inhomogeneous Poisson process. The resulting 270 spike trains had continuously lower pairwise  
807 correlation coefficients with the template spike train.

808 Finally, we accounted for the fact that, in barrel cortex *in vivo*, correlated synaptic inputs tend  
809 to fire at higher frequencies, while uncorrelated inputs fire at lower rates (O'Connor et al., 2010; Cossell  
810 et al., 2015). We parametrized the lognormal firing rate distribution measured by O'Conner et al. (2010)  
811 in mouse barrel cortex L2/3 *in vivo* (mean  $\pm$  s.d.:  $4.16 \pm 8.33$  Hz) and drew 270 random 'target firing  
812 rates' from it. These values were ranked and assigned to the 270 input spike trains, such that spike  
813 trains with higher pairwise correlations with the template spike train also displayed higher target firing  
814 rates. We then removed stochastically individual spikes from each input spike train such that the  
815 average firing rate of each spike train matched the respective target firing rate.

816 After the 270 input spike trains had been generated in this manner, we verified that their  
817 pairwise correlation coefficients (Cossell et al., 2015) and firing rates (O'Connor et al., 2010) matched  
818 experimental data obtained in rodent L2/3 *in vivo* (see *Results*, Fig. 4). This process was repeated 100  
819 times to generate 100 different sets of spike trains to be run in the model.

820

## 821 **Generating EPSP amplitude and corresponding paired-pulse ratio distributions**

822 To assign realistic EPSP amplitudes to the 270 model inputs, we parametrized the EPSP amplitude  
823 distribution we measured in regular-spiking neurons *in vitro* with a lognormal distribution (Fig. 1 D, see  
824 *Results*) and randomly drew 270 EPSP amplitude values from it. We then generated corresponding  
825 paired-pulse ratios for these 270 EPSP amplitudes by parametrized the relationship between the  
826 second pulse (EPSP<sub>2</sub>) and the first pulse (i.e., the EPSP amplitude) of the paired-pulse stimulation  
827 paradigm that we had recorded *in vitro* (Fig. 1 C) with an exponential decay function. Critically, the jitter  
828 of the experimentally recorded EPSP<sub>2</sub> values around this fitted curve did not differ significantly from a  
829 Gaussian distribution (non-parametric Kolmogorov Smirnov Test, p value of 0.48) with a mean  $\pm$  s.d. of  
830  $1.6 \cdot 10^{-9} \pm 0.192$ . This standard deviation captures the natural variance of the ratio of EPSP<sub>2</sub> to EPSP<sub>1</sub>  
831 and was subsequently used to generate our modeling data. For each of the selected 270 EPSP  
832 amplitudes, we first assigned a corresponding EPSP<sub>2</sub> by using the value predicted by the fitted  
833 exponential decay function for the given EPSP<sub>1</sub> (i.e., the EPSP amplitude). We then added variance to  
834 the selected value as a number drawn from a random Gaussian process with a mean of 0 and a  
835 standard deviation of 0.192. Finally, we verified that the resulting EPSP distribution, paired-pulse ratio  
836 distribution, and their mapping corresponded to our *in vitro* recording data (see *Results*).

837

## 838 **Modeling short-term plasticity dynamically during presynaptic spike trains**

839 The paired-pulse ratio captures a synapse's short-term plasticity response for two subsequent release  
840 events at a stereotypical time interval. To model short-term plasticity dynamically for ongoing activation  
841 during spike trains with variable inter-spike intervals, we formalized the short-term plasticity properties  
842 of our synapses into a general form by utilizing the widely-used extended Tsodyks-Markram model  
843 (Markram et al., 1998; Tsodyks et al., 1998):

844

$$\frac{dR(t)}{dt} = \frac{1 - R(t)}{\tau_{rec}} - u(t) \cdot R(t) \cdot \delta(t - t_{sp}) \quad (1)$$

845

$$\frac{du(t)}{dt} = \frac{U - u(t)}{\tau_{facil}} + f(1 - u(t)) \cdot \delta(t - t_{sp}) \quad (2)$$

846

847 Briefly, short-term depression (equation 1) is modeled as the depletion of the synaptic vesicle pool  
848 available for release  $R(t)$ , with  $u(t) \cdot R(t)$  following a preceding release event at time  $t_{sp}$ , which is  
849 counterbalanced by vesicle pool recovery at a time constant  $\tau_{rec}$ . Short-term facilitation (equation 2) is  
850 modeled as an increase in release probability  $u(t)$ , with  $f(1 - u(t))$  following a preceding spike at  $t_{sp}$ ,  
851 which decays to the baseline release probability  $U$  with a time constant  $\tau_{facil}$ . Thus, a continuum of

852 synaptic depression to facilitation can be modeled by specifying the values of the parameter set  $\theta =$   
 853  $\{\tau_{rec}, \tau_{facil}, U, f\}$  (Costa et al., 2013; Ghanbari et al., 2017).

854 To do so, we derived  $\theta$  for each one of the 270 model synapses as a function of their paired-  
 855 pulse ratio, as follows. A computationally optimized form of equations (1) and (2) was derived by Costa  
 856 et al. (2013) by integrating between spikes  $n$  and  $n + 1$  at time  $\Delta t_{n_n}$  apart:

$$R_{n+1} = 1 - (1 - R_n(1 - u_n)) e^{-\frac{\Delta t_n}{\tau_{rec}}} \quad (3)$$

857

$$u_{n+1} = U + (u_n + f(1 - u_n) - U) e^{-\frac{\Delta t_n}{\tau_{facil}}} \quad (4)$$

858

859 The EPSP amplitude at spike  $n$  can be calculated as:

$$EPSP_n = A \cdot R_n u_n \quad (5)$$

860 (Markram et al., 1998), where  $A$  is an adjustable weight parameter that convolves phenomenologically  
 861 several physiological strength parameters, such as the number of release sites, quantal size, and cable  
 862 filtering properties. The paired pulse ratio  $PPR$  is the ratio of the EPSP at spike  $n + 1$  and the EPSP at  
 863 spike  $n$ :

$$PPR = \frac{A \cdot R_{n+1} u_{n+1}}{A \cdot R_n u_n} \quad (6)$$

864

865 At time  $t = 0$ , when no preceding spike occurred, the steady-state value of  $R_n = 1$  and of  $u_n = U$ , and  
 866 equation (6) can be simplified to:

$$PPR_0 = \frac{R_{n+1} u_{n+1}}{U} \quad (7)$$

867

868 By inserting equations (3) and (4) for  $R_{n+1}$  and  $u_{n+1}$ , we can rewrite equation (7) as

$$PPR_0 = \frac{\left(1 - U e^{-\frac{\Delta t_n}{\tau_{rec}}}\right) \left(U + f(1 - U) e^{-\frac{\Delta t_n}{\tau_{facil}}}\right)}{U} \quad (8)$$

869

870 Critically,  $PPR_0$  in equation (8) at  $\Delta t_{n_n} = 20 \text{ ms}$  (i.e.,  $PPR_0^{20ms}$ ) describes exactly our experimental  
 871 paired-pulse stimulation protocol. This allowed us to obtain a parameter set  $\theta$  for each synapse as a  
 872 function of its 20 ms paired-pulse ratio.

873

## 874 **Defining the short-term plasticity parameter set $\theta$ for each synapse**

875 To do so, we varied  $\theta$  on a continuum ranging from strong depression to strong facilitation according  
 876 to Costa et al. (2013) (Table 1), which resulted in a large dataset of uniquely defined  $\theta$ s and  
 877 corresponding  $PPR_0^{20ms}$  values. For each of our 270 model synapses, we then chose the parameter set  
 878  $\theta$ , whose resulting  $PPR_0^{20ms}$  value matched most closely the paired-pulse ratio we had previously  
 879 assigned to that synapse (see above). By obtaining a unique parameter set  $\theta$  for each synapse, we

880 could then compute its  $R_{n+1}$  and  $u_{n+1}$  during continuous spike trains using equations (3) and (4),  
881 respectively.

882

883 **Table 1. Parameter sets  $\theta$  for strongly depressing and strongly facilitation synapses, adopted from Costa et al. (2013).**

884

| Synaptic short-term plasticity | $\tau_{rec}$ | $\tau_{facil}$ | U   | f    | $PPR_0^{20ms}$ |
|--------------------------------|--------------|----------------|-----|------|----------------|
| Strong depression              | 1700ms       | 20ms           | 0.7 | 0.05 | 0.3            |
| Strong facilitation            | 20ms         | 1700ms         | 0.1 | 0.11 | 1.8            |

885

886

### 887 **Modeling EPSP amplitude and paired-pulse ratio in the NEURON simulation**

888 We modeled the input synapses by using the *ExpSyn* point process in NEURON, which allows for the  
889 synaptic strength to be set precisely by means of a weight parameter. We defined the weight parameter  
890 as the product of the desired somatic EPSP amplitude and a scaling factor. To determine this scaling  
891 factor, we generated a single test spike for each of the 270 EPSP amplitudes (using its respective  
892 desired EPSP amplitude) and measured the resulting somatic EPSP amplitude. We found that the ratio  
893 of the desired EPSP / test EPSP was a constant factor across all 270 input synapses, which allowed  
894 us to use this ratio as the universal scaling factor.

895 By deriving paired-pulse ratios using equation (6), we were able to adjust the EPSP amplitudes  
896 dynamically in the simulation to incorporate short-term plasticity. To cross-check again that the  
897 simulated EPSP amplitudes and short-term plasticity properties reproduced the desired values, each  
898 synapse in the NEURON simulation was activated with two pulses at a 20 ms inter-spike interval and  
899 the somatic EPSP amplitudes and paired-pulse ratios measured at the soma of the model neuron.  
900 Reassuringly, we found that the resulting somatic EPSP amplitude distribution and paired-pulse ratio  
901 distribution exactly matched the target distributions we had generated (as described above).

902

### 903 **Modeling the interplay of synaptic strength, short-term plasticity, and temporal 904 correlation in presynaptic spike trains**

905 After the model was set up in this manner, we simulated the somatic voltage response of the model  
906 neuron following activation of the 270 input synapses with the corresponding presynaptic spike trains.  
907 We convolved the discrete spike times of the output spike train of the model neuron and each one of  
908 the 270 input spike trains into continuous functions with an exponential filter ( $\tau = 10ms$ ) (van Rossum,  
909 2001) and computed the pairwise Pearson's correlation coefficients between each input spike train and  
910 the output spike train. Additionally, we quantified the input-output relationship of the model neuron as  
911 the probability of spike generation as a function of the number of coincident inputs in the 20 ms time  
912 window preceding the output spike. As described in the *Results*, we then manipulated the respective  
913 population of active synapses and their synaptic parameters in the simulation to investigate the interplay  
914 of synaptic strength, short-term plasticity, and temporal correlation in presynaptic spike trains. We  
915 computed mean correlation coefficients, input-output curves and corresponding 95 % confidence  
916 intervals by repeating each simulation setup for the 100 sets of spike trains (see above).

## 917 **Acknowledgements**

918 We would like to thank Kevan A.C. Martin for his inspiration, support, comments on the manuscript, and  
919 funding. We would like to thank Qendrasa Parduzzi for help with developing the NEURON model. As  
920 members of the Institute of Neuroinformatics, the authors are signatories of the Basel Declaration. This  
921 work was supported by funding from the University of Zurich to Kevan A.C. Martin and by funding of  
922 the Swiss National Science Foundation to Gregor Schuhknecht.  
923

## 924 **Author Contributions**

925 B.E. and G.F.P.S. designed research,  
926 M.O.B. performed electrophysiology experiments and histology,  
927 M.O.B. and G.F.P.S. analyzed electrophysiology data,  
928 A.G. and B.E. developed the NEURON model,  
929 A.G. and G.F.P.S. analyzed modeling data,  
930 B.E. and G.F.P.S. supervised the work,  
931 G.F.P.S. wrote the paper with input from all authors.

## 932 **References**

- 933 Abbott LF, Regehr WG (2004) Synaptic computation. *Nature* 431:796–803.
- 934 Abbott LF, Varela JA, Sen K, Nelson SB (1997) Synaptic depression and cortical gain control. *Science*  
935 275:221–224.
- 936 Allen C, Stevens CF (1994) An evaluation of causes for unreliability of synaptic transmission. *Proc Natl*  
937 *Acad Sci USA* 91:10380–10383.
- 938 Azouz R (2005) Dynamic spatiotemporal synaptic integration in cortical neurons: neuronal gain,  
939 revisited. *J Neurophysiol* 94:2785–2796.
- 940 Banitt Y, Martin KAC, Segev I (2007) A biologically realistic model of contrast invariant orientation tuning  
941 by thalamocortical synaptic depression. *J Neurosci* 27:10230–10239.
- 942 Bloss EB, Cembrowski MS, Karsh B, Colonell J, Fetter RD, Spruston N (2018) Single excitatory axons  
943 form clustered synapses onto CA1 pyramidal cell dendrites. *Nat Neurosci* 21:353–363.
- 944 Bosking WH, Zhang Y, Schofield B, Fitzpatrick D (1997) Orientation selectivity and the arrangement of  
945 horizontal connections in tree shrew striate cortex. *J Neurosci* 17:2112–2127.
- 946 Boudreau CE, Ferster D (2005) Short-term depression in thalamocortical synapses of cat primary visual  
947 cortex. *J Neurosci* 25:7179–7190.
- 948 Branco T, Clark BA, Häusser M (2010) Dendritic discrimination of temporal input sequences in cortical  
949 neurons. *Science* 329:1671–1675.
- 950 Branco T, Häusser M (2011) Synaptic integration gradients in single cortical pyramidal cell dendrites.  
951 *Neuron* 69:885–892.
- 952 Bruno RM, Sakmann B (2006) Cortex is driven by weak but synchronously active thalamocortical  
953 synapses. *Science* 312:1622–1627.
- 954 Buzsáki A, Jacobs EW, Zhou T, Moss F, Kiss L (1991) Stochastic resonance in a single neuron model:  
955 theory and analog simulation. *J Theor Biol* 152:531–555.
- 956 Buzsáki G, Mizuseki K (2014) The log-dynamic brain: how skewed distributions affect network  
957 operations. *Nat Rev Neurosci* 15:264–278.
- 958 Castro-Alamancos MA, Oldford E (2002) Cortical sensory suppression during arousal is due to the  
959 activity-dependent depression of thalamocortical synapses. *J Physiol* 541:319–331.
- 960 Chance FS, Abbott LF, Reyes AD (2002) Gain modulation from background synaptic input. *Neuron*  
961 35:773–782.
- 962 Chance FS, Nelson SB, Abbott LF (1998) Synaptic depression and the temporal response  
963 characteristics of V1 cells. *J Neurosci* 18:4785–4799.
- 964 Chapeau-Blondeau F, Rousseau D (2002) Noise improvements in stochastic resonance: from signal  
965 amplification to optimal detection. *Fluct Noise Lett* 2:L221–L233.
- 966 Chung S, Li X, Nelson SB (2002) Short-term depression at thalamocortical synapses contributes to  
967 rapid adaptation of cortical sensory responses in vivo. *Neuron* 34:437–446.
- 968 Cossell L, Iacaruso MF, Muir DR, Houlton R, Sader EN, Ko H, Hofer SB, Mrsic-Flogel TD (2015)  
969 Functional organization of excitatory synaptic strength in primary visual cortex. *Nature*  
970 518:399–403.
- 971 Costa RP, Sjostrom PJ, van Rossum MCW (2013) Probabilistic inference of short-term synaptic  
972 plasticity in neocortical microcircuits. *Front Comput Neurosci* 7:75.

- 973 Crochet S, Poulet JFA, Kremer Y, Petersen CCH (2011) Synaptic mechanisms underlying sparse  
974 coding of active touch. *Neuron* 69:1160–1175.
- 975 de Kock CPJ, Bruno RM, Spors H, Sakmann B (2007) Layer- and cell-type-specific suprathreshold  
976 stimulus representation in rat primary somatosensory cortex. *J Physiol* 581:139–154.
- 977 de Kock CPJ, Sakmann B (2009) Spiking in primary somatosensory cortex during natural whisking in  
978 awake head-restrained rats is cell-type specific. *PNAS* 106:16446–16450.
- 979 Díaz-Quesada M, Martini FJ, Ferrati G, Bureau I, Maravall M (2014) Diverse thalamocortical short-term  
980 plasticity elicited by ongoing stimulation. *J Neurosci* 34:515–526.
- 981 Durand DM, Kawaguchi M, Mino H (2013) Reverse stochastic resonance in a hippocampal CA1 neuron  
982 model. In: 35th Annual International Conference of the IEEE Engineering in Medicine and  
983 Biology Society (EMBC), pp 5242–5245.
- 984 Faisal AA, Selen LPJ, Wolpert DM (2008) Noise in the nervous system. *Nat Rev Neurosci* 9:292–303.
- 985 Feldmeyer D, Lübke J, Sakmann B (2006) Efficacy and connectivity of intracolumnar pairs of layer 2/3  
986 pyramidal cells in the barrel cortex of juvenile rats. *J Physiol* 575:583–602.
- 987 Ferrarese L, Jouhanneau J-S, Remme MWH, Kremkow J, Katona G, Rózsa B, Schreiber S, Poulet JFA  
988 (2018) Dendrite-specific amplification of weak synaptic input during network activity in vivo. *Cell*  
989 *Rep* 24:3455–3465.e5.
- 990 Fortune ES, Rose GJ (2000) Short-term synaptic plasticity contributes to the temporal filtering of  
991 electrosensory information. *J Neurosci* 20:7122–7130.
- 992 Fortune ES, Rose GJ (2001) Short-term synaptic plasticity as a temporal filter. *Trends Neurosci* 24:381–  
993 385.
- 994 Ghanbari A, Malyshev A, Volgushev M, Stevenson IH (2017) Estimating short-term synaptic plasticity  
995 from pre- and postsynaptic spiking. *PLOS Comput Biol* 13:e1005738.
- 996 Gilbert CD, Wiesel TN (1989) Columnar specificity of intrinsic horizontal and corticocortical connections  
997 in cat visual cortex. *J Neurosci* 9:2432–2442.
- 998 Girman SV, Sauvé Y, Lund RD (1999) Receptive field properties of single neurons in rat primary visual  
999 cortex. *J Neurophysiol* 82:301–311.
- 1000 Goetz L, Roth A, Häusser M (2021) Active dendrites enable strong but sparse inputs to determine  
1001 orientation selectivity. *PNAS* 118(30).
- 1002 Guzman SJ, Schlögl A, Schmidt-Hieber C (2014) Stimfit: quantifying electrophysiological data with  
1003 Python. *Front Neuroinform* 8:16.
- 1004 Hardingham N, Fox K (2006) The role of nitric oxide and GluR1 in presynaptic and postsynaptic  
1005 components of neocortical potentiation. *J Neurosci* 26:7395–7404.
- 1006 Hardingham NR, Read JCA, Trevelyan AJ, Nelson JC, Jack JJB, Bannister NJ (2010) Quantal analysis  
1007 reveals a functional correlation between presynaptic and postsynaptic efficacy in excitatory  
1008 connections from rat neocortex. *J Neurosci* 30:1441–1451.
- 1009 Hines ML, Carnevale NT (1997) The NEURON simulation environment. *Neural Comput* 9:1179–1209.
- 1010 Hô N, Destexhe A (2000) Synaptic background activity enhances the responsiveness of neocortical  
1011 pyramidal neurons. *J Neurophysiol* 84:1488–1496.
- 1012 Holler S, Köstinger G, Martin KAC, Schuhknecht GFP, Stratford KJ (2021) Structure and function of a  
1013 neocortical synapse. *Nature* 591:111–116.
- 1014 Hubel DH, Wiesel TN (1962) Receptive fields, binocular interaction and functional architecture in the  
1015 cat's visual cortex. *J Physiol* 160:106–154.



- 1016 Jouhanneau J-S, Kremkow J, Dorn AL, Poulet JFA (2015) In vivo monosynaptic excitatory  
1017 transmission between layer 2 cortical pyramidal neurons. *Cell Rep* 13:2098–2106.
- 1018 Karimi A, Odenthal J, Drawitsch F, Boergens KM, Helmstaedter M (2020) Cell-type specific innervation  
1019 of cortical pyramidal cells at their apical dendrites. *eLife* 9:e46876.
- 1020 Kastellakis G, Cai DJ, Mednick SC, Silva AJ, Poirazi P (2015) Synaptic clustering within dendrites: An  
1021 emerging theory of memory formation. *Prog Neurobiol* 126:19–35.
- 1022 Kerr JND, de Kock CPJ, Greenberg DS, Bruno RM, Sakmann B, Helmchen F (2007) Spatial  
1023 organization of neuronal population responses in layer 2/3 of rat barrel cortex. *J Neurosci*  
1024 27:13316–13328.
- 1025 Koulakov AA, Hromádka T, Zador AM (2009) Correlated connectivity and the distribution of firing rates  
1026 in the neocortex. *J Neurosci* 29:3685–3694.
- 1027 Lajeunesse F, Kröger H, Timofeev I (2013) Regulation of AMPA and NMDA receptor-mediated EPSPs  
1028 in dendritic trees of thalamocortical cells. *J Neurophysiol* 109:13–30.
- 1029 Larkman AU, Hannay T, Stratford KJ, Jack JJB (1992) Presynaptic release probability influences the  
1030 locus of long-term potentiation. *Nature* 360:70–73.
- 1031 Larkman AU, Jack JJB, Stratford KJ (1997) Quantal analysis of excitatory synapses in rat hippocampal  
1032 CA1 in vitro during low-frequency depression. *J Physiol* 505:457–471.
- 1033 Larkman AU, Stratford KJ, Jack JJB (1991) Quantal analysis of excitatory synaptic action and  
1034 depression in hippocampal slices. *Nature* 350:344–347.
- 1035 Larkum ME (2004) Top-down dendritic input increases the gain of layer 5 pyramidal neurons. *Cereb*  
1036 *Cortex* 14:1059–1070.
- 1037 Lefort S, Petersen CCH (2017) Layer-dependent short-term synaptic plasticity between excitatory  
1038 neurons in the C2 barrel column of mouse primary somatosensory cortex. *Cereb Cortex*  
1039 27:3869–3878.
- 1040 Lefort S, Tómm C, Floyd Sarria J-C, Petersen CCH (2009) The excitatory neuronal network of the C2  
1041 barrel column in mouse primary somatosensory cortex. *Neuron* 61:301–316.
- 1042 Lisman J (1997) Bursts as a unit of neural information: making unreliable synapses reliable. *Trends*  
1043 *Neurosci* 20:38–43.
- 1044 London M, Schreibman A, Häusser M, Larkum ME, Segev I (2002) The information efficacy of a  
1045 synapse. *Nat Neurosci* 5:332–340.
- 1046 Mainen ZF, Sejnowski TJ (1996) Influence of dendritic structure on firing pattern in model neocortical  
1047 neurons. *Nature* 382:363–366.
- 1048 Malach R, Tootell RBH, Malonek D (1994) Relationship between orientation domains, cytochrome  
1049 oxidase stripes, and intrinsic horizontal connections in squirrel monkey area V2. *Cereb Cortex*  
1050 4:151–165.
- 1051 Markram H, Lübke J, Frotscher M, Roth A, Sakmann B (1997) Physiology and anatomy of synaptic  
1052 connections between thick tufted pyramidal neurones in the developing rat neocortex. *J Physiol*  
1053 500:409–440.
- 1054 Markram H, Wang Y, Tsodyks M (1998) Differential signaling via the same axon of neocortical pyramidal  
1055 neurons. *PNAS* 95:5323–5328.
- 1056 Martin KAC, Roth S, Rusch ES (2014) Superficial layer pyramidal cells communicate heterogeneously  
1057 between multiple functional domains of cat primary visual cortex. *Nat Commun* 5, 5252.
- 1058 Martin KAC, Schröder S (2016) Phase locking of multiple single neurons to the local field potential in  
1059 cat V1. *J Neurosci* 36:2494–2502.

- 1060 McDonnell MD, Abbott D (2009) What Is stochastic resonance? Definitions, misconceptions, debates,  
1061 and its relevance to biology. *PLOS Comput Biol* 5:e1000348.
- 1062 Niell CM, Stryker MP (2010) Modulation of visual responses by behavioral state in mouse visual cortex.  
1063 *Neuron* 65:472–479.
- 1064 O'Connor DH, Peron SP, Huber D, Svoboda K (2010) Neural activity in barrel cortex underlying vibrissa-  
1065 based object localization in mice. *Neuron* 67:1048–1061.
- 1066 Ohki K, Chung S, Ch'ng YH, Kara P, Reid RC (2005) Functional imaging with cellular resolution reveals  
1067 precise micro-architecture in visual cortex. *Nature* 433:597–603.
- 1068 Petersen CCH, Crochet S (2013) Synaptic computation and sensory processing in neocortical layer  
1069 2/3. *Neuron* 78:28–48.
- 1070 Pinsky PE, Rinsky J (1994) Intrinsic and network rhythmogenesis in a reduced Traub model for CA3  
1071 neurons. *J Comput Neurosci* 1:39–60.
- 1072 Reyes A, Sakmann B (1999) Developmental switch in the short-term modification of unitary EPSPs  
1073 evoked in layer 2/3 and layer 5 pyramidal neurons of rat neocortex. *J Neurosci* 19:3827–3835.
- 1074 Rothman JS, Cathala L, Steuber V, Silver RA (2009) Synaptic depression enables neuronal gain  
1075 control. *Nature* 457:1015–1018.
- 1076 Sakata S, Harris KD (2009) Laminar structure of spontaneous and sensory-evoked population activity  
1077 in auditory cortex. *Neuron* 64:404–418.
- 1078 Salinas E, Sejnowski TJ (2001) Correlated neuronal activity and the flow of neural information. *Nat Rev*  
1079 *Neurosci* 2:539–550.
- 1080 Sarid L, Feldmeyer D, Gidon A, Sakmann B, Segev I (2013) Contribution of intracolumnar layer 2/3-to-  
1081 layer 2/3 excitatory connections in shaping the response to whisker deflection in rat barrel  
1082 cortex. *Cereb Cortex* 25:849–858.
- 1083 Sato TR, Gray NW, Mainen ZF, Svoboda K (2007) The functional microarchitecture of the mouse barrel  
1084 cortex. *PLOS Biol* 5:e189.
- 1085 Scholl B, Thomas CI, Ryan MA, Kamasawa N, Fitzpatrick D (2020) Cortical response selectivity derives  
1086 from strength in numbers of synapses. *Nature* 590:111–114.
- 1087 Schoonover CE, Tapia J-C, Schilling VC, Wimmer V, Blazeski R, Zhang W, Mason CA, Bruno RM  
1088 (2014) Comparative strength and dendritic organization of thalamocortical and corticocortical  
1089 synapses onto excitatory layer 4 neurons. *J Neurosci* 34:6746–6758.
- 1090 Schüz A, Palm G (1989) Density of neurons and synapses in the cerebral cortex of the mouse. *J Comp*  
1091 *Neurol* 286:442–455.
- 1092 Seeman SC et al. (2018) Sparse recurrent excitatory connectivity in the microcircuit of the adult mouse  
1093 and human cortex. *eLife* 7:e37349.
- 1094 Silver RA (2010) Neuronal arithmetic. *Nat Rev Neurosci* 11:474–489.
- 1095 Silver RA, Lübke J, Sakmann B, Feldmeyer D (2003) High-probability unquantal transmission at  
1096 excitatory synapses in barrel cortex. *Science* 302:1981–1984.
- 1097 Sincich LC, Blasdel GG (2001) Oriented axon projections in primary visual cortex of the monkey. *J*  
1098 *Neurosci* 21:4416–4426.
- 1099 Smith SL, Smith IT, Branco T, Häusser M (2013) Dendritic spikes enhance stimulus selectivity in cortical  
1100 neurons in vivo. *Nature* 503:115–120.
- 1101 Song S, Sjöström PJ, Reigl M, Nelson S, Chklovskii DB (2005) Highly nonrandom features of synaptic  
1102 connectivity in local cortical circuits. *PLOS Biol* 3:e68.

- 1103 Stratford KJ, Tarczy-Hornoch K, Martin KAC, Bannister NJ, Jack JJB (1996) Excitatory synaptic inputs  
1104 to spiny stellate cells in cat visual cortex. *Nature* 382:258–261.
- 1105 Stuart G, Spruston N (1998) Determinants of voltage attenuation in neocortical pyramidal neuron  
1106 dendrites. *J Neurosci* 18:3501–3510.
- 1107 Tarczy-Hornoch K, Martin KAC, Stratford KJ, Jack JJB (1999) Intracortical excitation of spiny neurons  
1108 in layer 4 of cat striate cortex in vitro. *Cereb Cortex* 9:833–843.
- 1109 Tsodyks M, Pawelzik K, Markram H (1998) Neural networks with dynamic synapses. *Neural Comput*  
1110 10:821–835.
- 1111 Ujfalussy BB, Makara JK, Lengyel M, Branco T (2018) Global and multiplexed dendritic computations  
1112 under in vivo-like conditions. *Neuron* 100:579–592.
- 1113 van Rossum MCW (2001) A novel spike distance. *Neural Comput* 13:751–763.
- 1114 Volgushev M, Voronin LL, Chistiakova M, Artola A, Singer W (1995) All-or-none excitatory postsynaptic  
1115 potentials in the rat visual cortex. *Eur J Neurosci* 7:1751–1760.
- 1116 Wang H-P, Spencer D, Fellous J-M, Sejnowski TJ (2010) Synchrony of thalamocortical inputs  
1117 maximizes cortical reliability. *Science* 328:106–109.
- 1118 Waters J, Helmchen F (2006) Background synaptic activity is sparse in neocortex. *J Neurosci* 26:8267–  
1119 8277.
- 1120 Yi G, Wang J, Wei X, Deng B (2017) Action potential initiation in a two-compartment model of pyramidal  
1121 neuron mediated by dendritic Ca<sup>2+</sup> spike. *Sci Rep* 7:45684.
- 1122 Znamenskiy P, Kim M-H, Muir DR, Iacaruso MF, Hofer SB, Mrsic-Flogel TD (2018) Functional selectivity  
1123 and specific connectivity of inhibitory neurons in primary visual cortex. *bioRxiv:294835*.
- 1124
